# Supplementary material for: Operative vs Nonoperative Treatment of Distal Radius Fractures in Adults: A Systematic Review and Meta-analysis
Source: PubMed Central journal article supplement (PMC7180423; doi:10.1001/jamanetworkopen.2020.3497), 2020-04-23

## Supplementary Online Content

Ochen Y, Peek J, van der Velde D, et al. Operative vs nonoperative treatment of distal radius fractures in adults: a systematic review and meta-analysis. *JAMA Netw Open.* 2020;3(4):e203497.  
doi:10.1001/jamanetworkopen.2020.3497

**eTable 1.** Search Syntax Performed Last on June 15, 2019

**eTable 2.** Quality Assessment According to the MINORS Criteria in a Meta-analysis of Distal Radius Fractures

**eTable 3.** Treatment Characteristics of Included Studies in a Meta-analysis of Distal Radius Fractures

**eTable 4.** Quality Assessment of Included Studies in a Meta-analysis of Distal Radius Fractures

**eTable 5.** Functional Outcome Measures of Included Studies in a Meta-analysis of Distal Radius Fractures

**eTable 6.** Clinical Outcome Measures of Included Studies in a Meta-analysis of Distal Radius Fractures

**eTable 7.** Clinical Outcome Measures of Included Studies in a Meta-analysis of Distal Radius Fractures

**eTable 8.** Radiologic Outcome Measures of Included Studies in a Meta-analysis of Distal Radius Fractures

**eFigure 1.** PRISMA Flow Diagram Representing the Search and Selection of Studies Comparing Operative vs Nonoperative Treatment of Distal Radius Fractures

**eFigure 2.** Funnel Plot of Medium-Term ( $\leq 1$  y) DASH Score in a Meta-analysis of Distal Radius Fractures

**eFigure 3.** Funnel Plot of Complication Rate in a Meta-analysis of Distal Radius Fractures

**eFigure 4.** Forest Plot of Long-Term ( $> 1$  y) DASH Score in a Meta-analysis of Distal Radius Fractures

**eFigure 5.** Forest Plot of Medium-Term ( $\leq 1$  y) PRWE Score in a Meta-analysis of Distal Radius Fractures

**eFigure 6.** Forest Plot of Long-Term ( $>1$  y) PRWE Score in a Meta-analysis of Distal Radius Fractures

**eFigure 7.** Forest Plot of Medium-Term ( $\leq 1$  y) VAS Score in a Meta-analysis of Distal Radius Fractures

**eFigure 8.** Forest Plot of Long-Term ( $>1$  y) VAS Score in a Meta-analysis of Distal Radius Fractures

**eFigure 9.** Forest Plot of Grip Strength in Kilograms in a Meta-analysis of Distal Radius Fractures

**eFigure 10.** Forest Plot of Grip Strength as Percentage of Unaffected Side in a Meta-analysis of Distal Radius Fractures

**eFigure 11.** Forest Plot of Range of Wrist Extension in Degrees in a Meta-analysis of Distal Radius Fractures

**eFigure 12.** Forest Plot of Range of Wrist Flexion in Degrees in a Meta-analysis of Distal Radius Fractures

**eFigure 13.** Forest Plot of Range of Wrist Pronation in Degrees in a Meta-analysis of Distal Radius Fractures

**eFigure 14.** Forest Plot of Range of Wrist Supination in Degrees in a Meta-analysis of Distal Radius Fractures

**eFigure 15.** Forest Plot of Radial Deviation in Degrees in a Meta-analysis of Distal Radius Fractures

**eFigure 16.** Forest Plot of Ulnar Deviation in Degrees in a Meta-analysis of Distal Radius Fractures

**eFigure 17.** Forest Plot of Volar Tilt in Degrees in a Meta-analysis of Distal Radius Fractures

**eFigure 18.** Forest Plot of Radial Inclination in Degrees in a Meta-analysis of Distal Radius Fractures

**eFigure 19.** Forest Plot of Radial Height in Millimeters in a Meta-analysis of Distal Radius Fractures

**eFigure 20.** Forest Plot Of Articular Step-off in Millimeters in a Meta-analysis of Distal Radius Fractures

**eFigure 21.** Forest Plot of Ulnar Variance in Millimeters in a Meta-analysis of Distal Radius Fractures

**eFigure 22.** Forest Plot of Medium-Term ( $\leq 1$  y) DASH Score for Studies That Only Included Patients With Age  $>60$  Years and Other Studies That Included Patients With Age  $\geq 18$  Years in a Meta-analysis of Distal Radius Fractures

**eFigure 23.** Forest Plot of Complication Rate for Studies That Only Included Patients With Age  $>60$  Years and Other Studies That Included Patients With Age  $\geq 18$  Years in a Meta-analysis of Distal Radius Fractures

**eFigure 24.** Forest Plot of Medium-Term ( $\leq 1$  y) DASH Score in High-Quality Studies in a Meta-analysis of Distal Radius Fractures

**eFigure 25.** Forest Plot of Complication Rate in High-Quality Studies in a Meta-analysis of Distal Radius Fractures

**eFigure 26.** Forest Plot of Medium-Term ( $\leq 1$  y) DASH Score in Studies With a Study Period After 2008 in a Meta-analysis of Distal Radius Fractures

**eFigure 27.** Forest Plot of Complication Rate in Studies With a Study Period After 2008 in a Meta-analysis of Distal Radius Fractures

This supplementary material has been provided by the authors to give readers additional information about their work.

**eTable 1.** Search Syntax Performed Last on June 15, 2019

| Database                        | Syntax                                                                                                                                                                                                                                                                                                                                                                                                                                                                                                                                                                                                                                                                                                                                                                                                                                                                                                                                                                                                                                                                                                                                                                                                                                                                                                                                                                                                                                                                                         |
|---------------------------------|------------------------------------------------------------------------------------------------------------------------------------------------------------------------------------------------------------------------------------------------------------------------------------------------------------------------------------------------------------------------------------------------------------------------------------------------------------------------------------------------------------------------------------------------------------------------------------------------------------------------------------------------------------------------------------------------------------------------------------------------------------------------------------------------------------------------------------------------------------------------------------------------------------------------------------------------------------------------------------------------------------------------------------------------------------------------------------------------------------------------------------------------------------------------------------------------------------------------------------------------------------------------------------------------------------------------------------------------------------------------------------------------------------------------------------------------------------------------------------------------|
| <b>PubMed/MEDLINE (n= 1838)</b> | ((((((((radius fractures[MeSH Terms]) AND distal[Title/Abstract])) OR colles' fracture[MeSH Terms]) OR wrist injuries[MeSH Terms])) OR (((((((radius[Title/Abstract]) OR radial[Title/Abstract])) AND distal[Title/Abstract])) AND fractur*[Title/Abstract])) OR (((colles[Title/Abstract]) OR smith[Title/Abstract]) OR barton[Title/Abstract] OR wrist[Title/Abstract])) AND fractur*[Title/Abstract]))) AND (((((((surgical procedure, operative[MeSH Terms]) OR fracture fixation[MeSH Terms]) OR orthopedic procedure[MeSH Terms]) OR orthopedics[MeSH Terms])) OR (((((((surg*[Title/Abstract]) OR operat*[Title/Abstract]) OR orthop*[Title/Abstract]) OR pin*[Title/Abstract]) OR nail*[Title/Abstract]) OR screw*[Title/Abstract]) OR plat*[Title/Abstract]) OR rod*[Title/Abstract]) OR wire*[Title/Abstract]) OR fix*[Title/Abstract]) OR ORIF[Title/Abstract]) OR ExFix[Title/Abstract])) AND (((conservative treatment[MeSH Terms]) OR physical therapy modalities[MeSH Terms])) OR (((((((((((conserv*[Title/Abstract]) OR conven*[Title/Abstract]) OR non-operat*[Title/Abstract]) OR "non operative"[Title/Abstract]) OR nonoperat*[Title/Abstract]) OR non-surg*[Title/Abstract]) OR "non surgical"[Title/Abstract]) OR nonsurg*[Title/Abstract]) OR cast*[Title/Abstract]) OR splint*[Title/Abstract]) OR brace*[Title/Abstract]) OR bracing[Title/Abstract]) OR plaster[Title/Abstract]) OR bandage*[Title/Abstract]) OR tape*[Title/Abstract]) OR taping[Title/Abstract])) |
| <b>Embase (n= 1713)</b>         | ('distal radius fracture'/exp OR 'colles fracture'/exp OR (('radius':ab,ti OR 'radial':ab,ti) AND 'distal':ab,ti AND 'fractur*':ab,ti) OR (('colles':ab,ti OR 'smith':ab,ti OR 'barton':ab,ti OR 'wrist':ab,ti) AND 'fractur*':ab,ti) AND ('surgery'/de OR 'orthopedic surgery'/de OR 'surg*':ab,ti OR 'operat*':ab,ti OR 'orthop*':ab,ti OR 'pin*':ab,ti OR 'nail*':ab,ti OR 'screw*':ab,ti OR 'plate*':ab,ti OR 'rod*':ab,ti OR 'wire*':ab,ti OR 'fix*':ab,ti OR 'orif':ab,ti OR 'exfix':ab,ti) AND ('conservative treatment'/de OR 'conservative':ab,ti OR 'conventional':ab,ti OR 'non-operative':ab,ti OR 'non operative':ab,ti OR 'nonoperative':ab,ti OR 'non-surgical':ab,ti OR 'non surgical':ab,ti OR 'nonsurgical':ab,ti OR 'cast*':ab,ti OR 'splint*':ab,ti OR 'brace*':ab,ti OR 'bracing':ab,ti OR 'plaster*':ab,ti OR 'bandage':ab,ti OR 'tape*':ab,ti OR 'taping*':ab,ti)                                                                                                                                                                                                                                                                                                                                                                                                                                                                                                                                                                                                       |
| <b>CENTRAL (n= 837)</b>         | Radius AND distal AND fracture                                                                                                                                                                                                                                                                                                                                                                                                                                                                                                                                                                                                                                                                                                                                                                                                                                                                                                                                                                                                                                                                                                                                                                                                                                                                                                                                                                                                                                                                 |
| <b>CINAHL (n= 272)</b>          | (((MH distal radius OR TI distal radius OR AB distal radius OR TI radius OR AB radius OR TI radial OR AB radial OR TI colles OR AB colles OR TI smith OR AB smith OR TI barton OR AB barton OR TI wrist OR AB wrist) AND (MH fracture OR MH fractures OR TI fractur* OR AB fractur*)) AND ((MH surgical procedures, operative OR MH orthopedics OR TI surg* OR AB surg* OR TI operat* OR AB operat* OR TI orthop* OR AB orthop* OR TI pin* OR AB pin* OR TI nail* OR AB nail* OR TI screw* OR AB screw* OR TI plate* OR AB plate* OR TI rod* OR AB rod* OR TI wire* OR AB wire* OR TI fix* OR AB fix* OR TI ORIF OR AB ORIF OR TI ExFix OR AB ExFix) AND (MH Conservative Treatment OR MH physical therapy modalities OR TI conservative OR AB conservative OR TI conventional OR AB conventional OR TI non-operative OR AB non-operative OR TI non operative OR AB non operative OR TI nonoperative OR AB nonoperative OR TI non-surgical OR AB non-surgical OR TI non surgical OR AB non surgical OR TI nonsurgical OR AB nonsurgical OR TI cast* OR AB cast* OR TI brace* OR AB brace* OR TI splint* OR AB splint* OR TI bracing OR AB bracing OR TI bandage* OR AB bandage* OR TI tape* OR AB tape* OR TI taping OR AB taping OR TI plaster* OR AB plaster*))                                                                                                                                                                                                                              |

| <b>eTable 2. Quality Assessment According to the MINORS Criteria in a Meta-analysis of Distal Radius Fractures</b>                                          |                                                           |                                                  |                         |
|-------------------------------------------------------------------------------------------------------------------------------------------------------------|-----------------------------------------------------------|--------------------------------------------------|-------------------------|
| <b>Criteria</b>                                                                                                                                             | <b>Reported and adequate (2)</b>                          | <b>Reported but inadequate (1)</b>               | <b>Not reported (0)</b> |
| Clearly stated aim                                                                                                                                          | Aim including outcomes reported                           | Aim reported without outcomes                    | Not reported            |
| Inclusion consecutive patients                                                                                                                              | Inclusion/exclusion criteria reported                     | Unclear description inclusion/exclusion criteria | Not reported            |
| Prospective collection data                                                                                                                                 | Prospective                                               | Not applicable                                   | Not applicable          |
| Appropriate endpoints                                                                                                                                       | Appropriate endpoints to aim study                        | Endpoints not appropriate to aim study           | Not reported            |
| Unbiased assessment                                                                                                                                         | Blinded evaluation of outcomes                            | Reason not blinding stated                       | Not reported            |
| Appropriate follow-up                                                                                                                                       | ≥ 1 year                                                  | < 1 year                                         | Not reported            |
| Loss to follow-up < 5%                                                                                                                                      | ≤ 5%                                                      | > 5%                                             | Not applicable          |
| Prospective calculation study size                                                                                                                          | Prospective power-analysis performed                      | Prospective calculation without power-analysis   | Not applicable          |
| Adequate control group                                                                                                                                      | Operative versus nonoperative treatment                   | Not applicable                                   | Not applicable          |
| Contemporary groups                                                                                                                                         | Study/control group managed during same period            | Study/control not managed during same period     | Not reported            |
| Baseline equivalence groups                                                                                                                                 | Baseline characteristics described and comparable         | Baseline characteristics not comparable          | Not reported            |
| Adequate statistical analyses                                                                                                                               | Statistical analysis described including type of analyses | Inadequate description statistical analysis      | Not reported            |
| Items are scored 0 (not reported), 1 (reported but inadequate) or 2 (reported and adequate). The overall score ranging from 0 to 24 for comparative studies |                                                           |                                                  |                         |

| <b>eTable 3.</b> Treatment Characteristics of Included Studies in a Meta-analysis of Distal Radius Fractures |      |                |        |     |                            |                           |         |          |                               |                        |
|--------------------------------------------------------------------------------------------------------------|------|----------------|--------|-----|----------------------------|---------------------------|---------|----------|-------------------------------|------------------------|
| Study                                                                                                        | Year | Overall Number | Number |     | Included age group (years) | Fracture type (AO), n (%) |         |          | Operative Treatment           | Nonoperative Treatment |
|                                                                                                              |      |                | OP     | NON |                            | A                         | B       | C        |                               |                        |
| <b>RCTs</b>                                                                                                  |      |                |        |     |                            |                           |         |          |                               |                        |
| Abbaszadegan et al.                                                                                          | 1990 | 47             | 23     | 24  | >18                        | N/A                       | N/A     | N/A      | External fixation             | Cast                   |
| Arora et al.                                                                                                 | 2011 | 73             | 36     | 37  | >65                        | 22 (30)                   | 0       | 51 (70)  | ORIF volar locking plate      | Cast                   |
| Azzopardi et al.                                                                                             | 2005 | 54             | 27     | 27  | >60                        | 54 (100)                  | 0       | 0        | Percutaneous pinning          | Cast                   |
| Bartl et al.                                                                                                 | 2014 | 149            | 68     | 81  | >65                        | 149 (100)                 | 0       | 0        | ORIF volar locking plate      | Cast                   |
| Martinez-Mendez et al.                                                                                       | 2018 | 97             | 50     | 47  | >60                        | 0                         | 0       | 97 (100) | ORIF volar locking plate      | Cast                   |
| Mulders et al.                                                                                               | 2019 | 92             | 48     | 44  | 18-75                      | 92 (100)                  | 0       | 0        | ORIF volar locking plate      | Cast                   |
| Sharma et al.                                                                                                | 2014 | 64             | 32     | 32  | 22-55                      | 0                         | 28 (44) | 36 (56)  | ORIF volar locking plate      | Cast                   |
| Sirniö et al.                                                                                                | 2019 | 80             | 38     | 42  | >50                        | 48 (60)                   | 0       | 32 (40)  | ORIF volar locking plate      | Cast                   |
| <b>Observational studies</b>                                                                                 |      |                |        |     |                            |                           |         |          |                               |                        |
| Aktekin et al.                                                                                               | 2010 | 46             | 22     | 24  | >65                        | 22 (48)                   | 0       | 24 (52)  | External fixation             | Cast                   |
| Alm-Paulsen et al.                                                                                           | 2012 | 60             | 30     | 30  | 30-85                      | 34 (57)                   | 0       | 26 (43)  | Percutaneous pinning          | N/A                    |
| Arora et al.                                                                                                 | 2009 | 114            | 53     | 61  | >70                        | 59 (52)                   | 0       | 55 (48)  | ORIF volar locking plate      | Cast                   |
| Barai et al.                                                                                                 | 2018 | 116            | 29     | 87  | >18                        | N/A                       | N/A     | N/A      | ORIF                          | Cast                   |
| Chan et al.                                                                                                  | 2014 | 75             | 40     | 35  | >65                        | 33 (44)                   | 0       | 42 (56)  | ORIF volar locking plate      | Cast                   |
| Egol et al.                                                                                                  | 2010 | 90             | 44     | 46  | >65                        | 43 (48)                   | 9 (10)  | 38 (42)  | Volar plate/external fixation | Cast                   |
| Gong et al.                                                                                                  | 2011 | 50             | 26     | 24  | >18                        | 26 (52)                   | 0       | 24 (48)  | ORIF volar locking plate      | Cast                   |
| Hung et al.                                                                                                  | 2015 | 57             | 26     | 31  | 61-80                      | 23 (40)                   | 20 (35) | 14 (25)  | ORIF volar locking plate      | Cast                   |
| Jordan et al.                                                                                                | 2016 | 159            | 74     | 85  | >50                        | 102 (64)                  | 3 (2)   | 54 (34)  | K-wire fixation + cast        | Cast                   |
| Larouche et al.                                                                                              | 2016 | 129            | 70     | 59  | >55                        | N/A                       | N/A     | N/A      | ORIF                          | Cast                   |
| Leerdam et al.                                                                                               | 2019 | 272            | 87     | 185 | >18                        | 107 (39)                  | 86 (32) | 79 (29)  | N/A                           | N/A                    |
| Lutz et al.                                                                                                  | 2014 | 258            | 129    | 129 | >65                        | N/A                       | N/A     | N/A      | Multiple                      | Cast                   |
| Tan et al.                                                                                                   | 2012 | 63             | 31     | 32  | >18                        | 37 (59)                   | 2 (3)   | 24 (38)  | Intramedullary nail fixation  | Cast                   |
| Toon et al.                                                                                                  | 2017 | 60             | 32     | 28  | >21                        | 0                         | 16 (27) | 44 (73)  | ORIF volar locking plate      | Cast                   |
| Zengin et al.                                                                                                | 2019 | 49             | 25     | 24  | >60                        | 0                         | 0       | 49 (100) | ORIF volar locking plate      | Cast                   |

OP|NON operative/nonoperative; N/A not available; n number; ORIF Open Reduction Internal Fixation; AO Classification of Fractures

**eTable 4.** Quality Assessment of Included Studies in a Meta-analysis of Distal Radius Fractures

| MINORS criteria                    | RCTs                     |                   |                       |                   |                             |                    |                    |                     |                       |                     |                         |                   |                   |                  |                  |                  |                  |                    |                      |                     |                  |                 |                  |                    |   |
|------------------------------------|--------------------------|-------------------|-----------------------|-------------------|-----------------------------|--------------------|--------------------|---------------------|-----------------------|---------------------|-------------------------|-------------------|-------------------|------------------|------------------|------------------|------------------|--------------------|----------------------|---------------------|------------------|-----------------|------------------|--------------------|---|
|                                    | Abbaszadegan et al. 1190 | Arora et al. 2011 | Azzopardi et al. 2005 | Bartl et al. 2014 | Martinez-Mendez et al. 2018 | Mulders et al.2019 | Sharma et al. 2014 | Sirmio et al. 20119 | Observational studies | Aktekin et al. 2010 | Alm-Paulsen et al. 2012 | Arora et al. 2009 | Barai et al. 2018 | Chan et al. 2014 | Egol et al. 2010 | Gong et al. 2011 | Hung et al. 2015 | Jordan et al. 2016 | Larouche et al. 2016 | Leerdam et al. 2019 | Lutz et al. 2014 | Tan et al. 2012 | Toon et al. 2017 | Zengin et al. 2019 |   |
| Clearly stated aim                 | 1                        | 2                 | 2                     | 2                 | 2                           | 2                  | 2                  | 2                   |                       | 2                   | 2                       | 2                 | 2                 | 2                | 2                | 1                | 2                | 2                  | 2                    | 2                   | 2                | 2               | 2                | 2                  | 2 |
| Inclusion of consecutive patients  | 2                        | 2                 | 2                     | 2                 | 2                           | 2                  | 2                  | 2                   |                       | 2                   | 1                       | 2                 | 2                 | 2                | 1                | 2                | 2                | 2                  | 1                    | 1                   | 1                | 2               | 2                | 2                  | 2 |
| Prospective collection of data     | 2                        | 2                 | 2                     | 2                 | 2                           | 2                  | 2                  | 2                   |                       | 1                   | 1                       | 1                 | 1                 | 2                | 1                | 2                | 0                | 1                  | 2                    | 0                   | 1                | 1               | 1                | 1                  | 0 |
| Appropriate endpoints              | 2                        | 2                 | 2                     | 2                 | 2                           | 2                  | 2                  | 2                   |                       | 2                   | 2                       | 2                 | 2                 | 2                | 2                | 2                | 1                | 2                  | 2                    | 2                   | 2                | 2               | 2                | 2                  | 2 |
| Unbiased assessment endpoints      | 0                        | 1                 | 1                     | 2                 | 1                           | 1                  | 0                  | 0                   |                       | 1                   | 0                       | 1                 | 0                 | 0                | 0                | 1                | 0                | 2                  | 0                    | 0                   | 0                | 1               | 0                | 0                  |   |
| Appropriate follow-up              | 2                        | 2                 | 2                     | 2                 | 2                           | 2                  | 2                  | 2                   |                       | 2                   | 2                       | 2                 | 1                 | 2                | 2                | 1                | 1                | 2                  | 2                    | 2                   | 1                | 2               | 2                | 2                  | 2 |
| Loss to follow-up < 5%             | 2                        | 1                 | 1                     | 1                 | 2                           | 2                  | 2                  | 1                   |                       | 1                   | 2                       | 1                 | 1                 | 2                | 1                | 1                | 0                | 1                  | 0                    | 0                   | 2                | 2               | 1                | 0                  |   |
| Prospective calculation study size | 0                        | 2                 | 2                     | 0                 | 2                           | 2                  | 0                  | 2                   |                       | 0                   | 0                       | 0                 | 2                 | 0                | 0                | 2                | 0                | 0                  | 2                    | 0                   | 0                | 0               | 2                | 0                  |   |
| Adequate control group             | 2                        | 2                 | 2                     | 2                 | 2                           | 2                  | 2                  | 2                   |                       | 2                   | 2                       | 2                 | 2                 | 2                | 2                | 2                | 2                | 2                  | 2                    | 0                   | 2                | 2               | 2                | 2                  |   |
| Contemporary groups                | 2                        | 2                 | 2                     | 2                 | 2                           | 2                  | 2                  | 2                   |                       | 0                   | 1                       | 0                 | 0                 | 2                | 2                | 2                | 2                | 2                  | 0                    | 2                   | 2                | 2               | 0                | 2                  |   |
| Baseline equivalence of groups     | 0                        | 2                 | 1                     | 2                 | 2                           | 2                  | 2                  | 1                   |                       | 2                   | 1                       | 2                 | 2                 | 1                | 2                | 2                | 2                | 2                  | 0                    | 0                   | 1                | 2               | 2                | 2                  |   |
| Adequate statistical analysis      | 2                        | 2                 | 2                     | 2                 | 2                           | 2                  | 2                  | 2                   |                       | 2                   | 2                       | 2                 | 2                 | 2                | 2                | 2                | 2                | 2                  | 2                    | 2                   | 2                | 2               | 2                | 2                  |   |
| <b>Total MINORS score</b>          | <b>17</b>                | <b>22</b>         | <b>21</b>             | <b>21</b>         | <b>23</b>                   | <b>23</b>          | <b>20</b>          | <b>20</b>           |                       | <b>17</b>           | <b>16</b>               | <b>17</b>         | <b>17</b>         | <b>19</b>        | <b>17</b>        | <b>20</b>        | <b>14</b>        | <b>20</b>          | <b>15</b>            | <b>11</b>           | <b>16</b>        | <b>20</b>       | <b>18</b>        | <b>16</b>          |   |

Items are scored 0 (not reported/ not applicable), 1 (reported but inadequate) or 2 (reported and adequate). The overall score ranging from 0 to 24 for comparative studies

| <b>eTable 5.</b> Functional Outcome Measures of Included Studies in a Meta-analysis of Distal Radius Fractures |                            |             |                            |             |                           |           |                            |              |                            |              |                           |           |
|----------------------------------------------------------------------------------------------------------------|----------------------------|-------------|----------------------------|-------------|---------------------------|-----------|----------------------------|--------------|----------------------------|--------------|---------------------------|-----------|
| Study                                                                                                          | DASH ≤ 1 year <sup>#</sup> |             | PRWE ≤ 1 year <sup>#</sup> |             | VAS ≤ 1 year <sup>#</sup> |           | DASH > 1 year <sup>#</sup> |              | PRWE > 1 year <sup>#</sup> |              | VAS > 1 year <sup>#</sup> |           |
|                                                                                                                | OP                         | NON         | OP                         | NON         | OP                        | NON       | OP                         | NON          | OP                         | NON          | OP                        | NON       |
| <b>RCTs</b>                                                                                                    |                            |             |                            |             |                           |           |                            |              |                            |              |                           |           |
| Abbaszadegan et al. 1990                                                                                       | N/A                        |             | N/A                        |             | 0                         | 1         | N/A                        |              | N/A                        |              | N/A                       |           |
| Arora et al. 2011                                                                                              | 5,7 (11,1)                 | 8,0 (9,3)   | 12,8 (23,2)                | 14,6 (22,8) | 0,1 (0,3)                 | 0,1 (0,5) | N/A                        |              | N/A                        |              | N/A                       |           |
| Azzopardi et al. 2005                                                                                          | N/A                        |             | N/A                        |             | 0,7 (1,3)                 | 1,2 (1,6) | N/A                        |              | N/A                        |              | N/A                       |           |
| Bartl et al. 2014                                                                                              | 14 (16,1)                  | 19 (21,3)   | N/A                        |             | N/A                       |           | N/A                        |              | N/A                        |              | N/A                       |           |
| Martinez-Mendez et al. 2018                                                                                    | N/A                        |             | N/A                        |             | N/A                       |           | 16 (14)                    | 28 (21)      | 17 (13)                    | 30 (25)      | 2 (2)                     | 3 (2)     |
| Mulders et al. 2019                                                                                            | 2,5 (9,4)*                 | 9,2 (10,8)* | 4,0 (9,3)*                 | 8,0 (11,9)* | N/A                       |           | N/A                        |              | N/A                        |              | N/A                       |           |
| Sharma et al. 2014                                                                                             | 4,9 (9,4)                  | 14,0 (10,2) | N/A                        |             | N/A                       |           | N/A                        |              | N/A                        |              | N/A                       |           |
| Sirniö et al. 2019                                                                                             | 7,2                        | 14,4        | N/A                        |             | N/A                       |           | N/A                        |              | N/A                        |              | N/A                       |           |
| <b>Observational studies</b>                                                                                   |                            |             |                            |             |                           |           |                            |              |                            |              |                           |           |
| Aktekin et al. 2010                                                                                            | N/A                        |             | N/A                        |             | N/A                       |           | 21,9 (21,7)                | 20,3 (13)    | N/A                        |              | N/A                       |           |
| Alm-Paulsen et al. 2012                                                                                        | N/A                        |             | N/A                        |             | N/A                       |           | 13,5 (15)                  | 10 (13)      | 11 (15)                    | 8 (12)       | 5 (11)                    | 2 (7)     |
| Arora et al. 2009                                                                                              | N/A                        |             | N/A                        |             | N/A                       |           | 11,1 (12,9)*               | 11,6 (13,4)* | 9,3 (9,3)*                 | 16,9 (12,1)* | 1,7 (1,4)                 | 0,7 (1,4) |
| Barai et al. 2018                                                                                              | N/A                        |             | N/A                        |             | N/A                       |           | 12,1 (14,4)                | 6 (10,9)     | N/A                        |              | N/A                       |           |
| Chan et al. 2014                                                                                               | 6,7 (1,9)                  | 6,2 (1,9)   | N/A                        |             | N/A                       |           | N/A                        |              | N/A                        |              | N/A                       |           |
| Egol et al. 2010                                                                                               | 10 (20,3)                  | 12,1 (29,6) | N/A                        |             | 1,2 (1,7)                 | 1,5 (2,1) | N/A                        |              | N/A                        |              | N/A                       |           |
| Gong et al. 2011                                                                                               | 13,9 (8,8)                 | 25,9 (14,0) | N/A                        |             | N/A                       |           | N/A                        |              | N/A                        |              | N/A                       |           |
| Hung et al. 2015                                                                                               | N/A                        |             | N/A                        |             | N/A                       |           | 4,5                        | 13,6         | N/A                        |              | N/A                       |           |
| Jordan et al. 2016                                                                                             | N/A                        |             | N/A                        |             | N/A                       |           | 26,6 (6,5)                 | 27,1 (7,7)   | N/A                        |              | N/A                       |           |
| Larouche et al. 2016                                                                                           | 10,9 (14,7)                | 11,0 (11,9) | 12,3 (15,8)                | 10,9 (14,1) | N/A                       |           | N/A                        |              | N/A                        |              | N/A                       |           |
| Leerdam et al. 2019                                                                                            | N/A                        |             | N/A                        |             | N/A                       |           | N/A                        |              | 17 (22)                    | 8 (15)       | N/A                       |           |
| Lutz et al. 2014                                                                                               | N/A                        |             | N/A                        |             | N/A                       |           | N/A                        |              | 17 (23)                    | 16 (18)      | N/A                       |           |
| Tan et al. 2012                                                                                                | 9 (12)                     | 28 (22)     | N/A                        |             | N/A                       |           | 7 (9)                      | 25 (24)      | N/A                        |              | N/A                       |           |
| Toon et al. 2017                                                                                               | 16,2 (17,4)                | 16,1 (17,7) | N/A                        |             | 1,8 (1,6)                 | 1,1 (1,1) | N/A                        |              | N/A                        |              | N/A                       |           |
| Zengin et al. 2019                                                                                             | N/A                        |             | N/A                        |             | N/A                       |           | 11,7 (8)                   | 17,6 (14,2)  | N/A                        |              | N/A                       |           |

OP|NON operative/nonoperative; n number; # mean (SD); N/A not available; \* median

| <b>eTable 6. Clinical Outcome Measures of Included Studies in a Meta-analysis of Distal Radius Fractures</b> |                                 |            |                                       |              |                                              |             |                                            |               |
|--------------------------------------------------------------------------------------------------------------|---------------------------------|------------|---------------------------------------|--------------|----------------------------------------------|-------------|--------------------------------------------|---------------|
| <b>Study</b>                                                                                                 | <b>Complication<sup>§</sup></b> |            | <b>Grip strength (kg)<sup>#</sup></b> |              | <b>Range wrist extension (°)<sup>#</sup></b> |             | <b>Range wrist flexion (°)<sup>#</sup></b> |               |
|                                                                                                              | <b>OP</b>                       | <b>NON</b> | <b>OP</b>                             | <b>NON</b>   | <b>OP</b>                                    | <b>NON</b>  | <b>OP</b>                                  | <b>NON</b>    |
| <b>RCTs</b>                                                                                                  |                                 |            |                                       |              |                                              |             |                                            |               |
| Abbaszadegan et al. 1990                                                                                     | 4 (17)                          | 0          | N/A                                   |              | N/A                                          |             | N/A                                        |               |
| Arora et al. 2011                                                                                            | 13 (36)                         | 5 (14)     | 22,2 (6,3)                            | 18,8 (5,8)   | 59 (10)                                      | 61 (7)      | 55 (11)                                    | 57 (10)       |
| Azzopardi et al. 2005                                                                                        | 1 (4)                           | 1 (4)      | 77 (21)*                              | 72 (17)*     | 94 (11)*                                     | 95 (9)*     | 87 (12)*                                   | 82 (15)*      |
| Bartl et al. 2014                                                                                            | 8 (12)                          | 10 (12)    | N/A                                   |              | 7,5 (11,7)**                                 | 7,5 (10)**  | 8,2 (11,9)**                               | 11,5 (12,8)** |
| Martinez-Mendez et al. 2018                                                                                  | 2 (4)                           | 1 (2)      | 73 (27)*                              | 64 (33)*     | 57 (11)                                      | 54 (13)     | 54 (13)                                    | 60 (16)       |
| Mulders et al. 2019                                                                                          | 16 (33)                         | 25 (57)    | 26 (1,9)^                             | 20 (8,4)^    | 85 (7,4)^                                    | 80 (14,8)^  | 80 (11,9)^                                 | 70 (14,8)^    |
| Sharma et al. 2014                                                                                           | 8 (25)                          | 29 (91)    | 89,0 (4,3)*                           | 72,1 (4,4)*  | 84,3 (2,4)                                   | 69,0 (3,91) | 83,8 (2,9)                                 | 65,9 (7,5)    |
| Sirmiö et al. 2019                                                                                           | 3 (8)                           | 5 (12)     | 27 (5)                                | 26 (7)       | 69 (6)                                       | 68 (7)      | 71 (7)                                     | 64 (11)       |
| <b>Observational studies</b>                                                                                 |                                 |            |                                       |              |                                              |             |                                            |               |
| Aktekin et al. 2010                                                                                          | 7 (32)                          | 10 (42)    | 19                                    | 18           | 63                                           | 44          | 61                                         | 53            |
| Alm-Paulsen et al. 2012                                                                                      | 6 (20)                          | 3 (10)     | 30 (12)                               | 27 (10)      | N/A                                          |             | N/A                                        |               |
| Arora et al. 2009                                                                                            | 7 (13)                          | 5 (8)      | 19,4 (6)                              | 21,1 (7)     | 57 (11,6)                                    | 59,8 (7,0)  | 44,6 (10,4)                                | 49,6 (9,8)    |
| Barai et al. 2018                                                                                            | 1 (3)                           | 7 (8)      | N/A                                   |              | N/A                                          |             | N/A                                        |               |
| Chan et al. 2014                                                                                             | 5 (13)                          | 4 (11)     | 82 (19)*                              | 77 (17)*     | N/A                                          |             | N/A                                        |               |
| Egol et al. 2010                                                                                             | 7 (16)                          | 4 (9)      | 17,7 (7,3)                            | 12,7 (6,5)   | 54,8 (18,7)                                  | 54,6 (14,9) | 47,8 (13,1)                                | 51,8 (11,1)   |
| Gong et al. 2011                                                                                             | 1 (4)                           | 0          | N/A                                   |              | N/A                                          |             | N/A                                        |               |
| Hung et al. 2015                                                                                             | 0                               | 1 (3)      | N/A                                   |              | 60^                                          | 60^         | 60^                                        | 60^           |
| Jordan et al. 2016                                                                                           | N/A                             |            | N/A                                   |              | N/A                                          |             | N/A                                        |               |
| Larouche et al. 2016                                                                                         | 14 (11)                         |            | N/A                                   |              | N/A                                          |             | N/A                                        |               |
| Leerdam et al. 2019                                                                                          | N/A                             |            | N/A                                   |              | N/A                                          |             | N/A                                        |               |
| Lutz et al. 2014                                                                                             | 50 (39)                         | 27 (21)    | N/A                                   |              | N/A                                          |             | N/A                                        |               |
| Tan et al. 2012                                                                                              | 7 (23)                          | 20 (63)    | 83 (17)*                              | 78 (24)*     | N/A                                          |             | N/A                                        |               |
| Toon et al. 2017                                                                                             | 1 (3)                           | 0          | 83,3 (14,1)*                          | 81,3 (22,9)* | 67,5 (13,7)                                  | 72,9 (13,2) | 63,1 (10,2)                                | 64,1 (13)     |
| Zengin et al. 2019                                                                                           | N/A                             |            | 67,7 (11,7)*                          | 57,5 (19,6)* | N/A                                          |             | N/A                                        |               |

OP/NON operative/nonoperative; <sup>§</sup> number (%); <sup>#</sup> mean (SD); N/A not available; \* percentage of unaffected side; \*\* difference between fractured side and unaffected side; ^ median



| <b>eTable 7. Clinical Outcome Measures of Included Studies in a Meta-analysis of Distal Radius Fractures</b> |                                   |             |                                    |             |                              |             |                             |             |
|--------------------------------------------------------------------------------------------------------------|-----------------------------------|-------------|------------------------------------|-------------|------------------------------|-------------|-----------------------------|-------------|
| <b>Study</b>                                                                                                 | <b>Range wrist pronation (°)#</b> |             | <b>Range wrist supination (°)#</b> |             | <b>Radial deviation (°)#</b> |             | <b>Ulnar deviation (°)#</b> |             |
|                                                                                                              | <b>OP</b>                         | <b>NON</b>  | <b>OP</b>                          | <b>NON</b>  | <b>OP</b>                    | <b>NON</b>  | <b>OP</b>                   | <b>NON</b>  |
| <b>RCTs</b>                                                                                                  |                                   |             |                                    |             |                              |             |                             |             |
| Abbaszadegan et al. 1990                                                                                     | N/A                               |             | N/A                                |             | N/A                          |             | N/A                         |             |
| Arora et al. 2011                                                                                            | 84 (7)                            | 85 (8)      | 85(8)                              | 85 (8)      | 24 (6)                       | 25 (7)      | 35 (8)                      | 35 (8)      |
| Azzopardi et al. 2005                                                                                        | 100 (2)*                          | 97 (6)*     | 91 (19)*                           | 95 (7)*     | 89 (15)*                     | 80 (31)*    | 93 (12)*                    | 76 (26)*    |
| Bartl et al. 2014                                                                                            | 2,8 (5,6)**                       | 2,6 (9,4)** | 2,5 (5,9)**                        | 3,2 (8,3)** | 3,9 (6,3)**                  | 3,0 (5,7)** | 4,4 (7,5)**                 | 5,9 (8,0)** |
| Martinez-Mendez et al. 2018                                                                                  | 84 (10)                           | 71 (19)     | 85 (5)                             | 72 (20)     | N/A                          |             | N/A                         |             |
| Mulders et al. 2019                                                                                          | 90 (7,4)^                         | 85 (11,1)^  | 85 (11,1)^                         | 75 (11,1)^  | 15 (7,4)^                    | 15 (3,7)^   | 25 (4,4)^                   | 25 (7,4)^   |
| Sharma et al. 2014                                                                                           | 34,1 (2,6)                        | 32,0 (2,9)  | 43,4 (3,5)                         | 41,9 (3,9)  | 79,1 (3,7)                   | 62,8 (6,6)  | 79,6 (3,0)                  | 65,9 (5,4)  |
| Sirniö et al. 2019                                                                                           | 88 (5)                            | 88 (6)      | 88 (5)                             | 84 (10)     | 22 (6)                       | 22 (5)      | 28 (5)                      | 25 (6)      |
| <b>Observational studies</b>                                                                                 |                                   |             |                                    |             |                              |             |                             |             |
| Aktekin et al. 2010                                                                                          | 62                                | 60          | 51                                 | 53          | 13                           | 14          | 18                          | 11          |
| Alm-Paulsen et al. 2012                                                                                      | N/A                               |             | N/A                                |             | N/A                          |             | N/A                         |             |
| Arora et al. 2009                                                                                            | 82,2 (8,9)                        | 81,4 (8,6)  | 83,0 (9,9)                         | 82,5 (6,8)  | 20,6 (8,6)                   | 21,2 (8,4)  | 38,0 (9,4)                  | 36,4 (9,2)  |
| Barai et al. 2018                                                                                            | N/A                               |             | N/A                                |             | N/A                          |             | N/A                         |             |
| Chan et al. 2014                                                                                             | N/A                               |             | N/A                                |             | N/A                          |             | N/A                         |             |
| Egol et al. 2010                                                                                             | 82,9 (6,8)                        | 84,4 (3,8)  | 80,6 (8,1)                         | 83,9 (3,0)  | 18,7 (7,9)                   | 22,9 (13,4) | 29,9 (8,8)                  | 30,3 (7,1)  |
| Gong et al. 2011                                                                                             | N/A                               |             | N/A                                |             | N/A                          |             | N/A                         |             |
| Hung et al. 2015                                                                                             | 85^                               | 90^         | 90^                                | 80^         | N/A                          |             | N/A                         |             |
| Jordan et al. 2016                                                                                           | N/A                               |             | N/A                                |             | N/A                          |             | N/A                         |             |
| Larouche et al. 2016                                                                                         | N/A                               |             | N/A                                |             | N/A                          |             | N/A                         |             |
| Leerdam et al. 2019                                                                                          | N/A                               |             | N/A                                |             | N/A                          |             | N/A                         |             |
| Lutz et al. 2014                                                                                             | N/A                               |             | N/A                                |             | N/A                          |             | N/A                         |             |
| Tan et al. 2012                                                                                              | N/A                               |             | N/A                                |             | N/A                          |             | N/A                         |             |
| Toon et al. 2017                                                                                             | N/A                               |             | N/A                                |             | 15,6 (7,3)                   | 15,7 (5,2)  | 22,8 (8,0)                  | 17,9 (6,0)  |
| Zengin et al. 2019                                                                                           | N/A                               |             | N/A                                |             | N/A                          |             | N/A                         |             |

OP|NON operative/nonoperative; § number (%); # mean (SD); N/A not available; \* percentage of unaffected side; \*\* difference between fractured side and unaffected side; ^ median

| <b>eTable 8.</b> Radiologic Outcome Measures of Included Studies in a Meta-analysis of Distal Radius Fractures |                             |              |                                     |            |                                 |           |                                      |           |                                  |            |
|----------------------------------------------------------------------------------------------------------------|-----------------------------|--------------|-------------------------------------|------------|---------------------------------|-----------|--------------------------------------|-----------|----------------------------------|------------|
| Study                                                                                                          | Volar tilt (°) <sup>#</sup> |              | Radial inclination (°) <sup>#</sup> |            | Radial height (mm) <sup>#</sup> |           | Articular step-off (mm) <sup>#</sup> |           | Ulnar variance (mm) <sup>#</sup> |            |
|                                                                                                                | OP                          | NON          | OP                                  | NON        | OP                              | NON       | OP                                   | NON       | OP                               | NON        |
| <b>RCTs</b>                                                                                                    |                             |              |                                     |            |                                 |           |                                      |           |                                  |            |
| Abbaszadegan et al. 1990                                                                                       | N/A                         |              | N/A                                 |            | N/A                             |           | N/A                                  |           | N/A                              |            |
| Arora et al. 2011                                                                                              | 3,0 (7,2)                   | -10,4 (19,1) | 21,2 (2,6)                          | 15,9 (9,0) | N/A                             |           | 0,2 (0,5)                            | 0,6 (1,1) | 0,7 (1,8)                        | 3,2 (2,9)  |
| Azzopardi et al. 2005                                                                                          | N/A                         |              | 22,5 (5)                            | 19 (6)     | 8 (3)                           | 5 (4)     | N/A                                  |           | 3 (2)                            | 3 (2)      |
| Bartl et al. 2014                                                                                              | N/A                         |              | 20,3 (4,5)                          | 17,7 (6,3) | N/A                             |           | N/A                                  |           | N/A                              |            |
| Martinez-Mendez et al. 2018                                                                                    | 8 (8)                       | 4 (8)        | 19 (6)                              | 13 (6)     | 9 (2)                           | 5 (3)     | 0,4 (1)                              | 1 (3)     | 4 (3)                            | 1 (2)      |
| Mulders et al. 2019                                                                                            | N/A                         |              | N/A                                 |            | N/A                             |           | N/A                                  |           | N/A                              |            |
| Sharma et al. 2014                                                                                             | 8,3 (1,0)                   | 5,1 (0,5)    | 17,8 (0,8)                          | 15,2 (0,7) | 8,2 (0,6)                       | 6,1 (1,1) | N/A                                  |           | -0,2 (0,2)                       | 0,2 (0,0)  |
| Sirniö et al. 2019                                                                                             | N/A                         |              | 24 (4)                              | 21 (8)     | N/A                             |           | N/A                                  |           | -0,7 (0,9)                       | -2,0 (1,7) |
| <b>Observational studies</b>                                                                                   |                             |              |                                     |            |                                 |           |                                      |           |                                  |            |
| Aktekin et al. 2010                                                                                            | 11                          | 8            | 18                                  | 20         | 10                              | 8         | N/A                                  |           | 0,27                             | 0,5        |
| Alm-Paulsen et al. 2012                                                                                        | N/A                         |              | 21 (6)                              | 19 (7)     | 7 (4)                           | 6 (5)     | N/A                                  |           | 3 (2)                            | 3 (3)      |
| Arora et al. 2009                                                                                              | N/A                         |              | 23,6 (3,8)                          | 19,2 (6,9) | N/A                             |           | N/A                                  |           | 1,5 (1,9)                        | 3,8 (2,6)  |
| Barai et al. 2018                                                                                              | N/A                         |              | N/A                                 |            | N/A                             |           | N/A                                  |           | N/A                              |            |
| Chan et al. 2014                                                                                               | N/A                         |              | N/A                                 |            | N/A                             |           | N/A                                  |           | N/A                              |            |
| Egol et al. 2010                                                                                               | 6,2 (9,2)                   | -5,8 (10,4)  | 22,3 (4,7)                          | 18,0 (4,0) | 10,6 (2,5)                      | 8,7 (1,6) | N/A                                  |           | 1,5 (2,2)                        | 2,8 (1,8)  |
| Gong et al. 2011                                                                                               | 8,1 (1,5)                   | 5,3 (3,4)    | 19,2 (2,2)                          | 14,3 (5,6) | 9,5 (1,3)                       | 6,3 (3,2) | N/A                                  |           | N/A                              |            |
| Hung et al. 2015                                                                                               | 9,6 (7,3)                   | -5,2 (15)    | 21,0 (4,6)                          | 17,9 (5,0) | 9,8 (2,4)                       | 8,6 (2,6) | N/A                                  |           | N/A                              |            |
| Jordan et al. 2016                                                                                             | N/A                         |              | N/A                                 |            | 10,9 (2,6)                      | 8,2 (2,2) | 0,9 (0,5)                            | 0,9 (0,6) | N/A                              |            |
| Larouche et al. 2016                                                                                           | 8,3 (7,9)                   | 1,3 (12,3)   | 24,2 (5,2)                          | 21,2 (6,0) | 11,1 (3,4)                      | 9,7 (3,4) | 0,1 (0,4)                            | 0,1 (0,4) | -0,8 (2,4)                       | -1,6 (2,8) |
| Leerdam et al. 2019                                                                                            | N/A                         |              | N/A                                 |            | N/A                             |           | N/A                                  |           | N/A                              |            |
| Lutz et al. 2014                                                                                               | 2 (9)                       | 7 (13)       | 20 (5)                              | 19 (6)     | N/A                             |           | 0,3 (0,7)                            | 0,2 (0,6) | 1,3 (2,1)                        | 2,6 (2,2)  |
| Tan et al. 2012                                                                                                | N/A                         |              | N/A                                 |            | N/A                             |           | N/A                                  |           | N/A                              |            |
| Toon et al. 2017                                                                                               | 5,6 (8,9)                   | 0,1 (11,6)   | 21,6 (6,1)                          | 16,9 (6,3) | 9,6 (3,3)                       | 7,2 (3,4) | 0,7 (0,6)                            | 1,5 (0,9) | N/A                              |            |
| Zengin et al. 2019                                                                                             | N/A                         |              | 21,5 (2,6)                          | 16,6 (5,3) | 10,4 (2,8)                      | 7,8 (2,4) | 0,6 (0,5)                            | 1,4 (0,9) | 1,7 (1,7)                        | 2,1 (2,1)  |
| OP NON operative/nonoperative; n number; <sup>#</sup> mean (SD); N/A not available                             |                             |              |                                     |            |                                 |           |                                      |           |                                  |            |

**eFigure 1.** PRISMA Flow Diagram Representing the Search and Selection of Studies Comparing Operative vs Nonoperative Treatment of Distal Radius Fractures

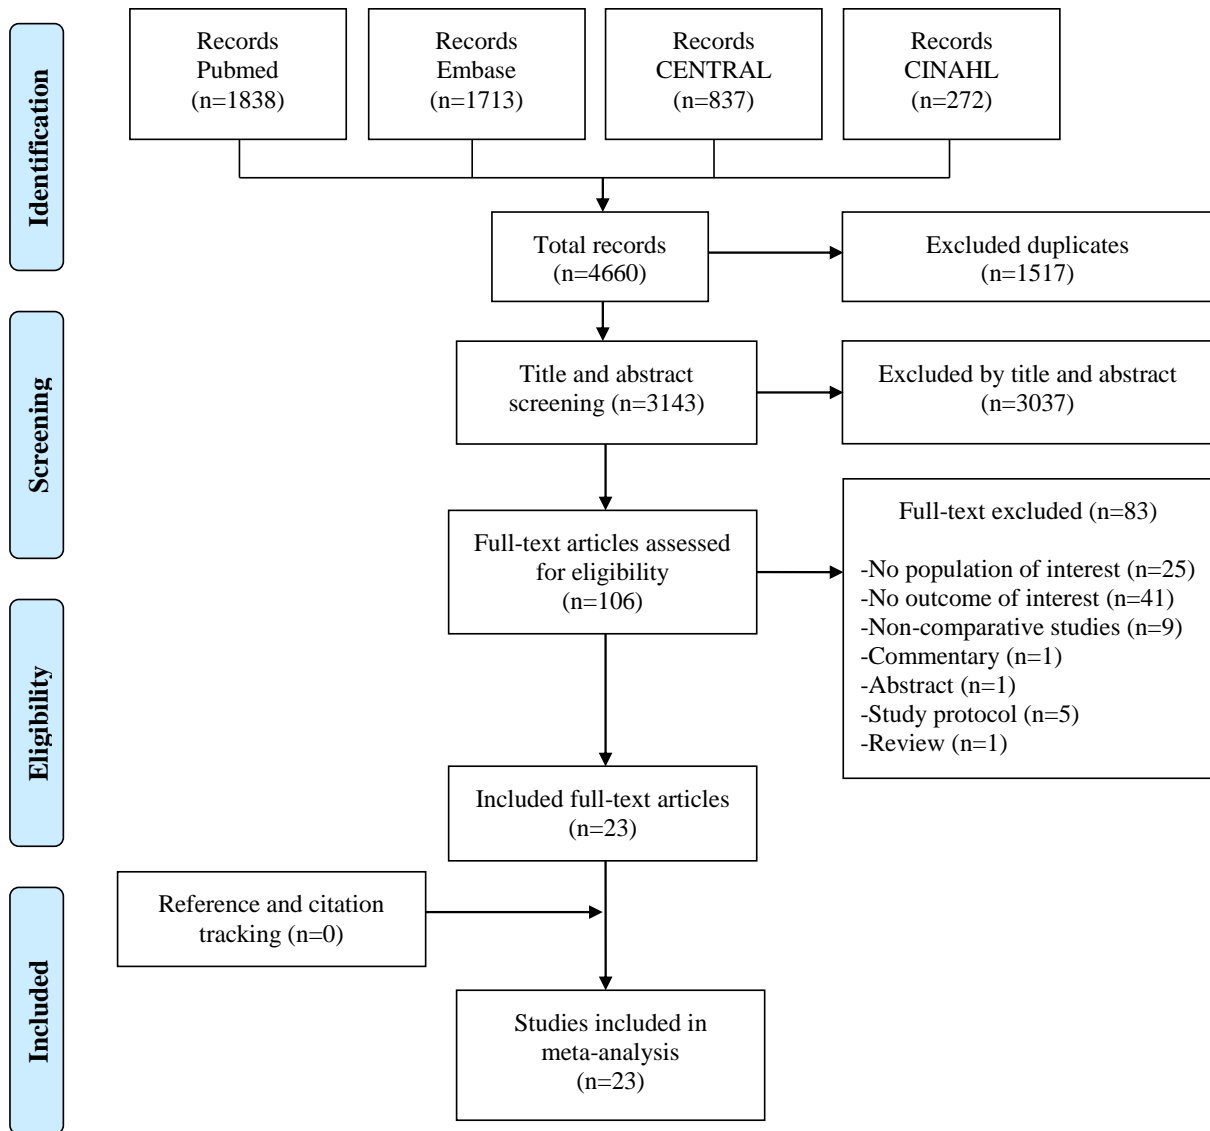

**eFigure 2.** Funnel Plot of Medium-Term ( $\leq 1$  y) DASH Score in a Meta-analysis of Distal Radius Fractures

(MD mean difference; SE standard error).

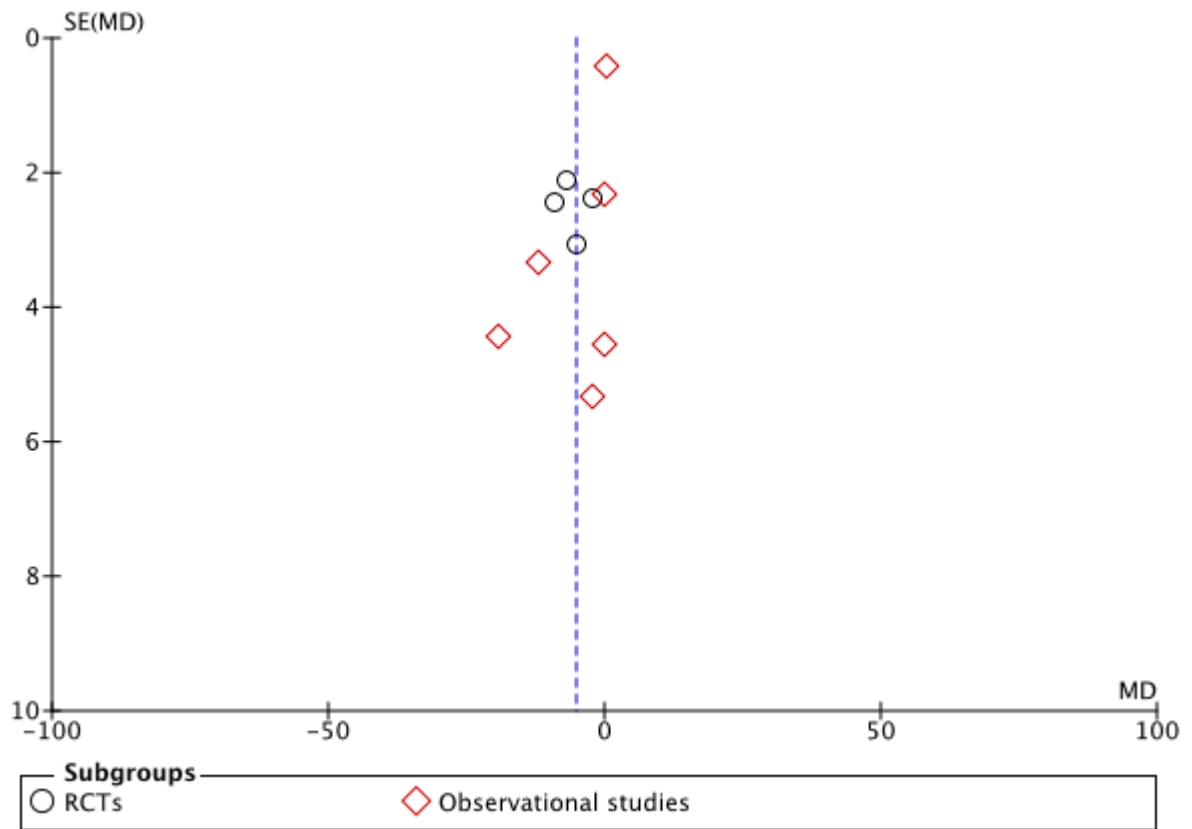

**eFigure 3.** Funnel Plot of Complication Rate in a Meta-analysis of Distal Radius Fractures

(RR risk ratio; SE standard error).

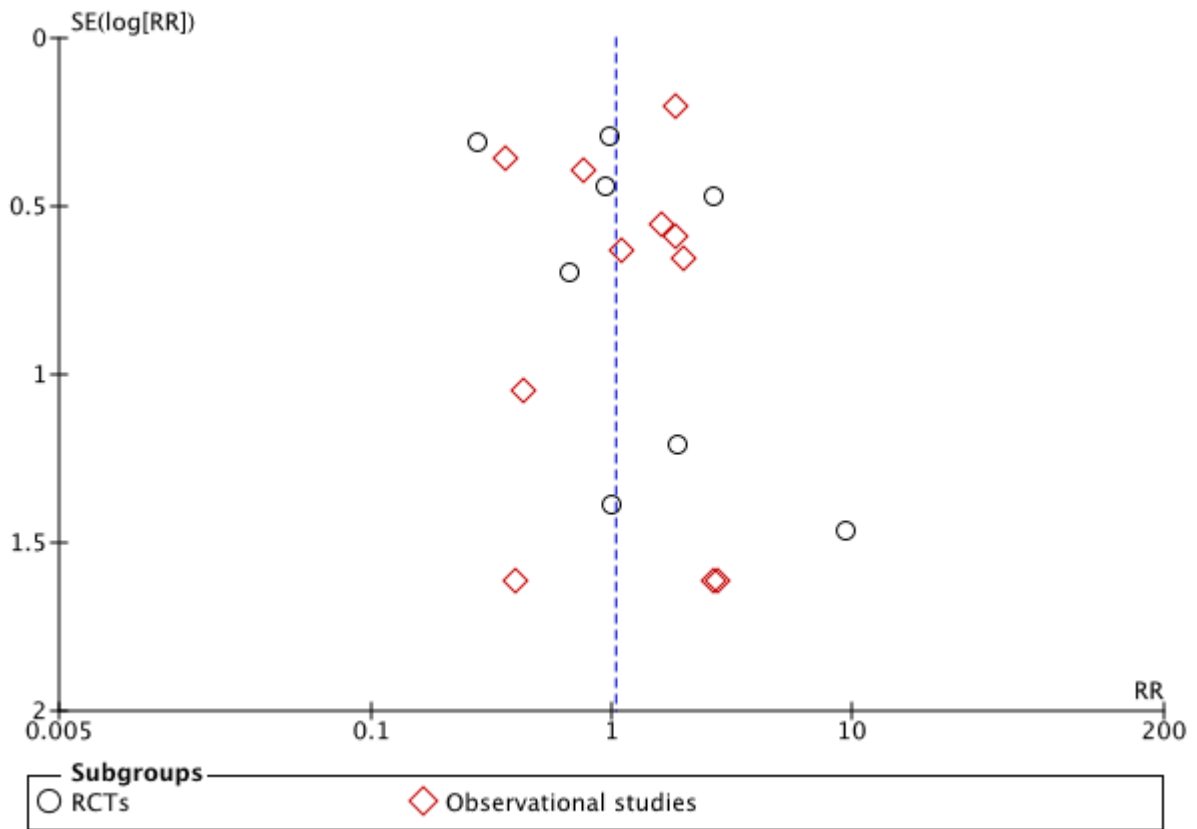

**eFigure 4.** Forest Plot of Long-Term (> 1 y) DASH Score in a Meta-analysis of Distal Radius Fractures

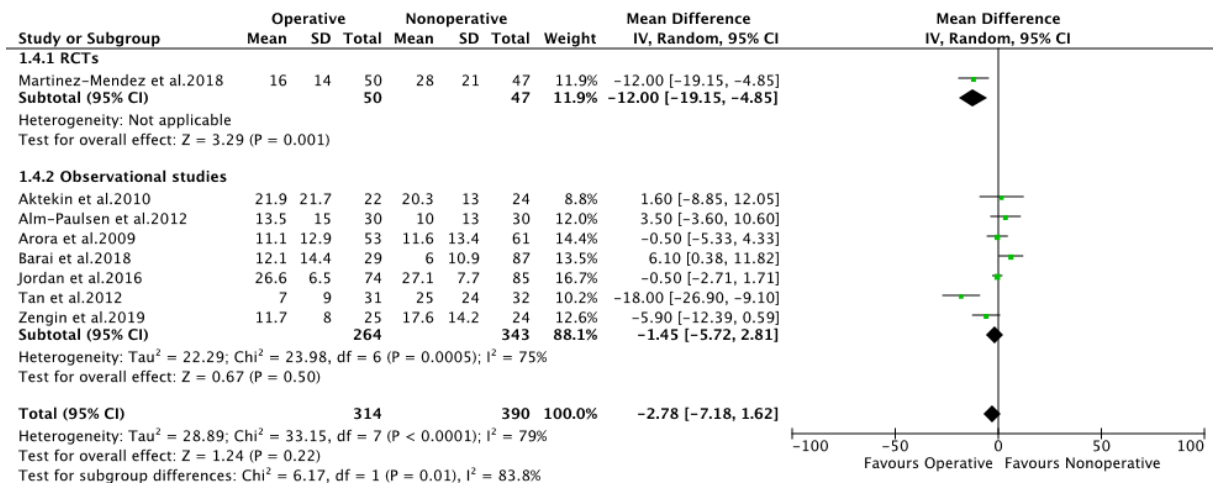

**eFigure 5.** Forest Plot of Medium-Term ( $\leq 1$  y) PRWE Score in a Meta-analysis of Distal Radius Fractures

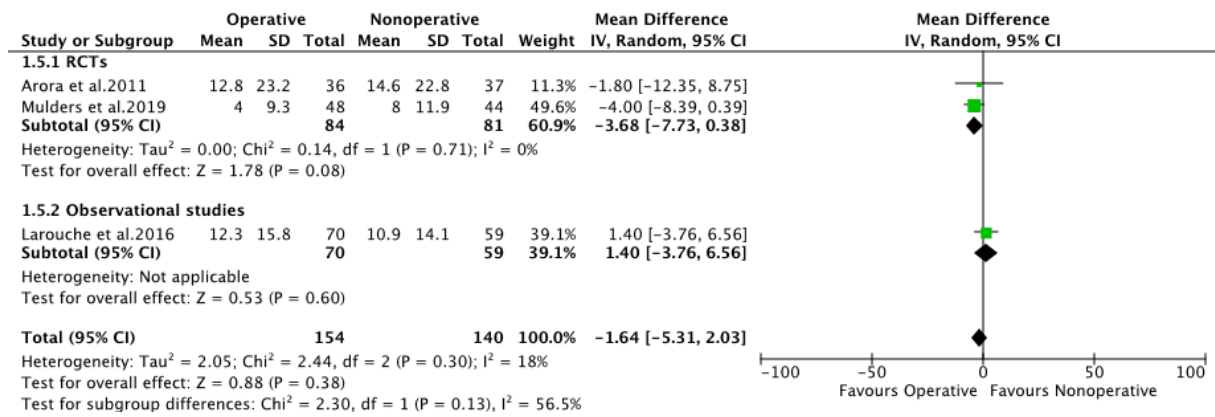

**eFigure 6.** Forest Plot of Long-Term (>1 y) PRWE Score in a Meta-analysis of Distal Radius Fractures

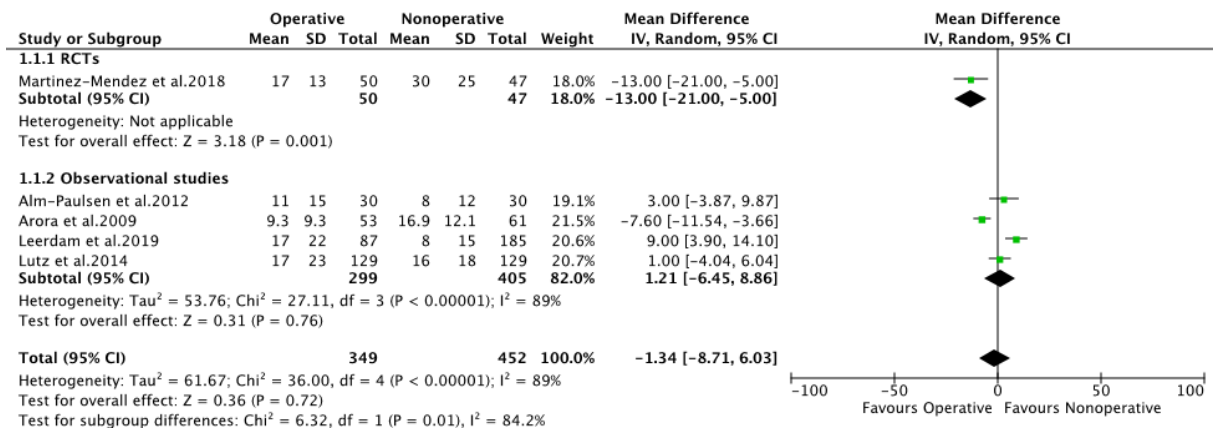



**eFigure 7.** Forest Plot of Medium-Term ( $\leq 1$  y) VAS Score in a Meta-analysis of Distal Radius Fractures

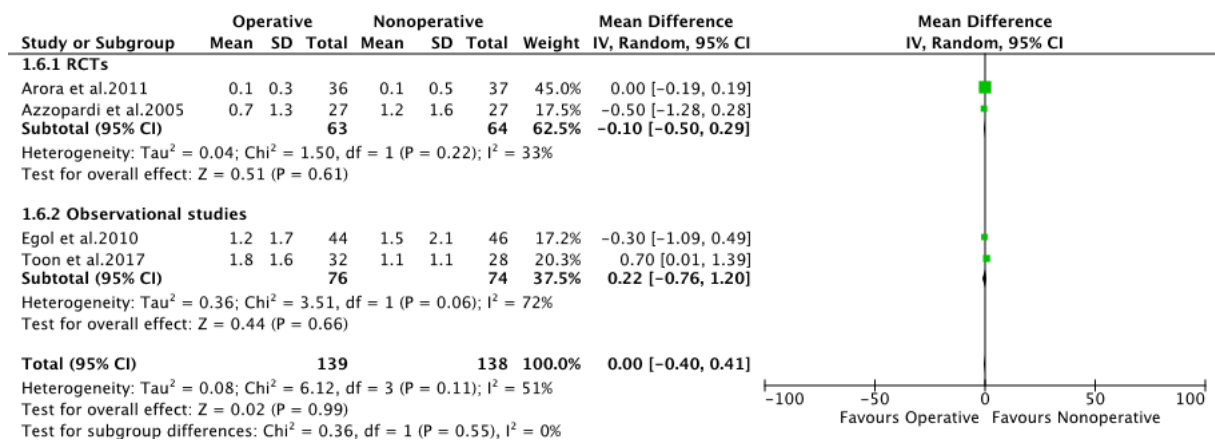

**eFigure 8.** Forest Plot of Long-Term (>1 y) VAS Score in a Meta-analysis of Distal Radius Fractures

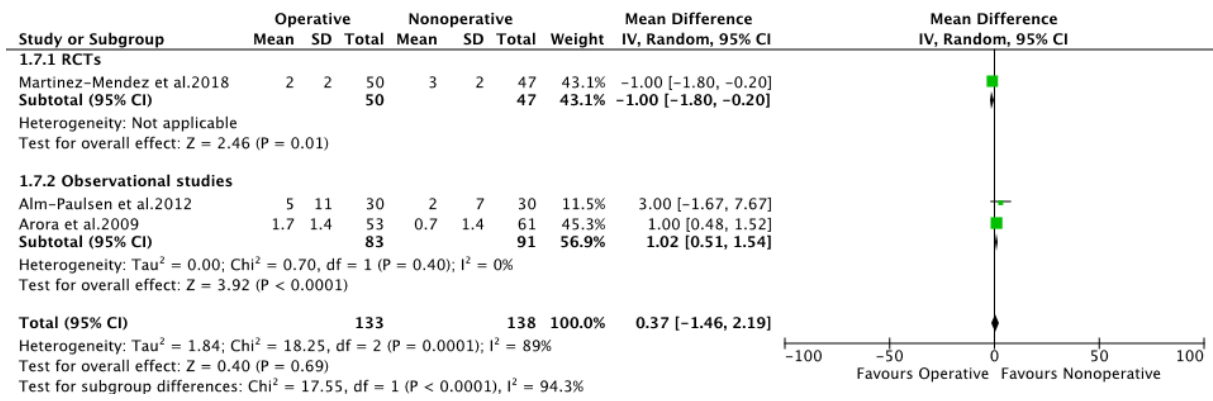

**eFigure 9.** Forest Plot of Grip Strength (in kg) in a Meta-analysis of Distal Radius Fractures

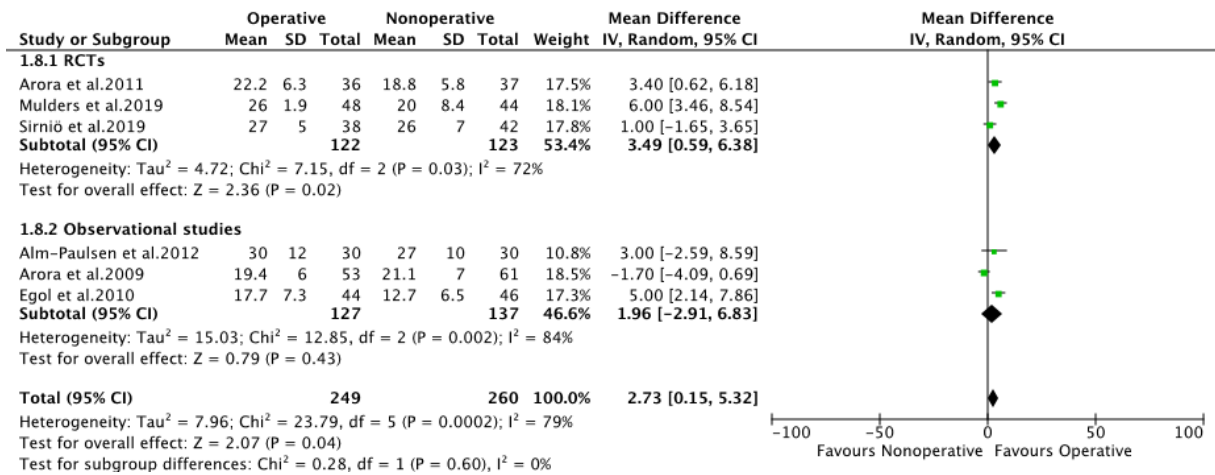

**eFigure 10.** Forest Plot of Grip Strength as Percentage of Unaffected Side in a Meta-analysis of Distal Radius Fractures

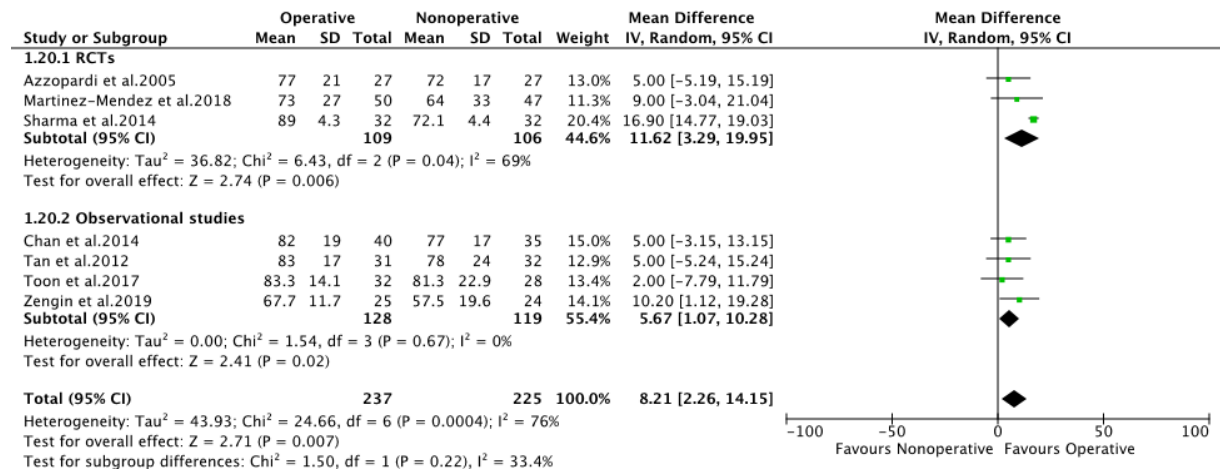

**eFigure 11.** Forest Plot of Range of Wrist Extension in Degrees in a Meta-analysis of Distal Radius Fractures

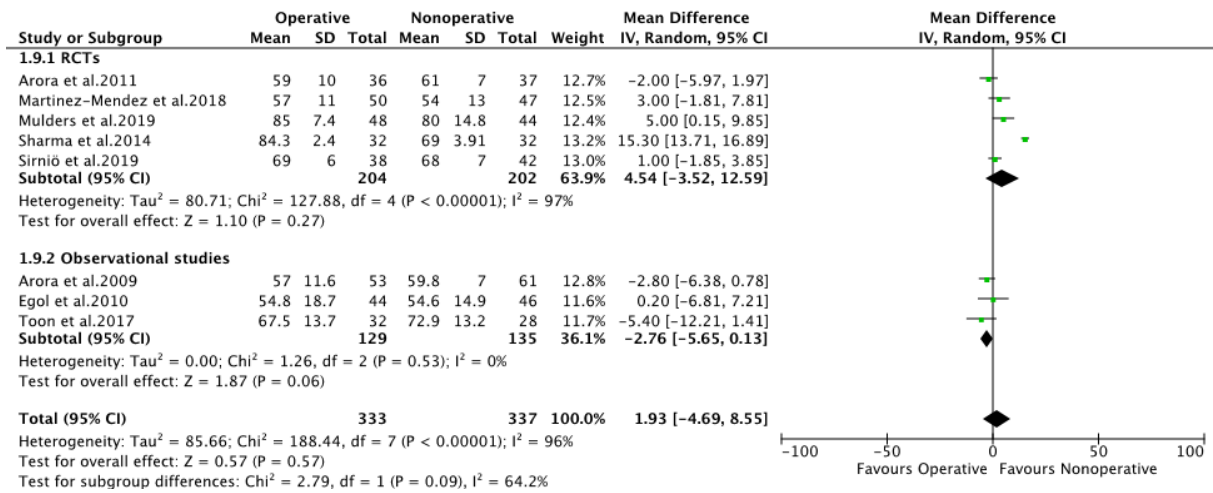

**eFigure 12.** Forest Plot of Range of Wrist Flexion in Degrees in a Meta-analysis of Distal Radius Fractures

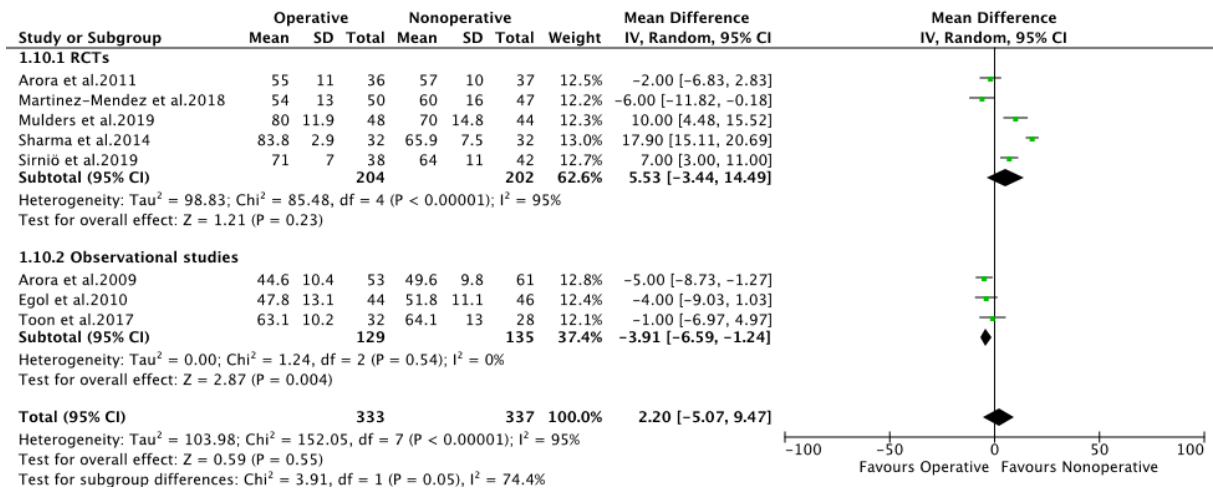

**eFigure 13.** Forest Plot of Range of Wrist Pronation in Degrees in a Meta-analysis of Distal Radius Fractures

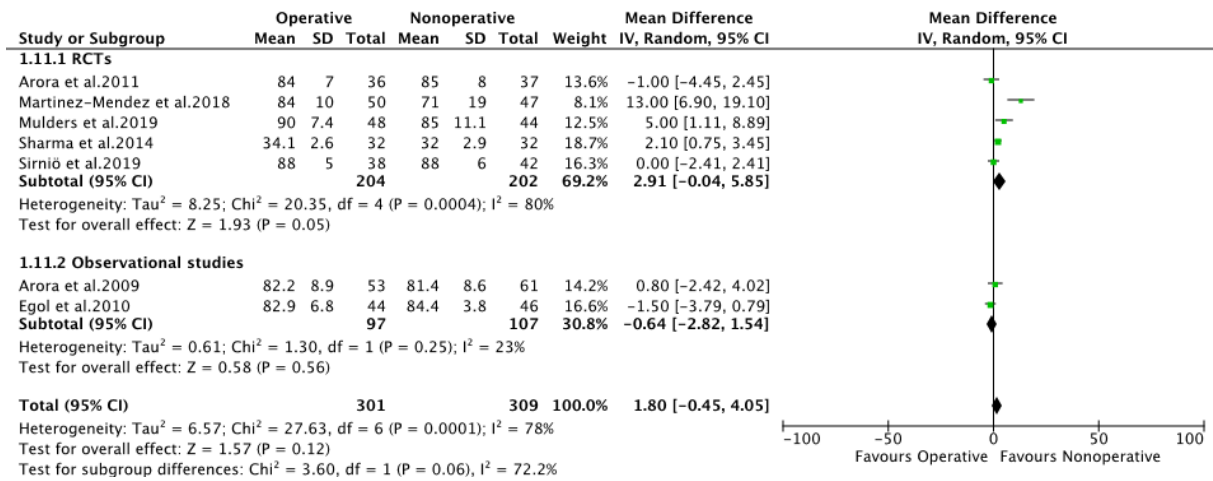

**eFigure 14.** Forest Plot of Range of Wrist Supination in Degrees in a Meta-analysis of Distal Radius Fractures

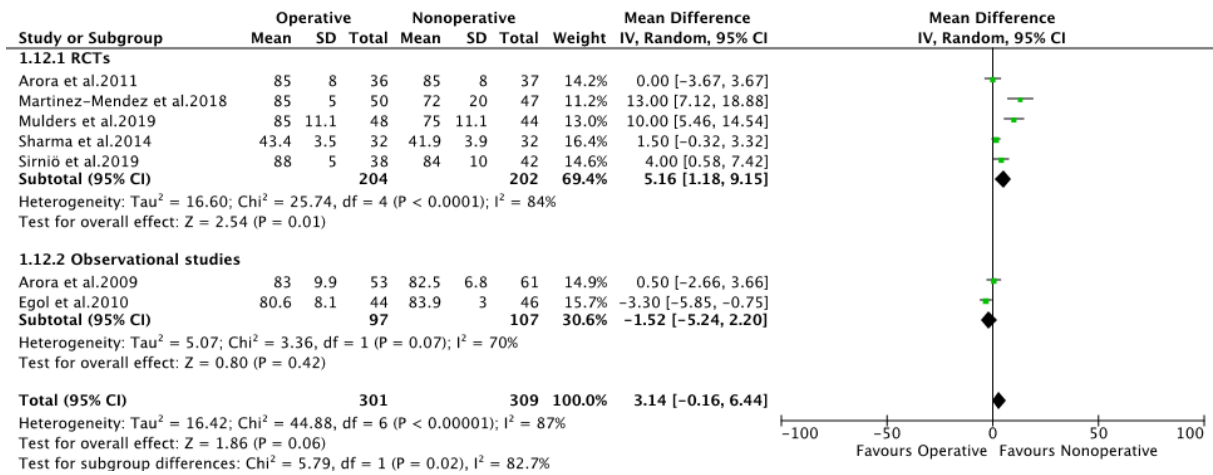



**eFigure 15.** Forest Plot of Radial Deviation in Degrees in a Meta-analysis of Distal Radius Fractures

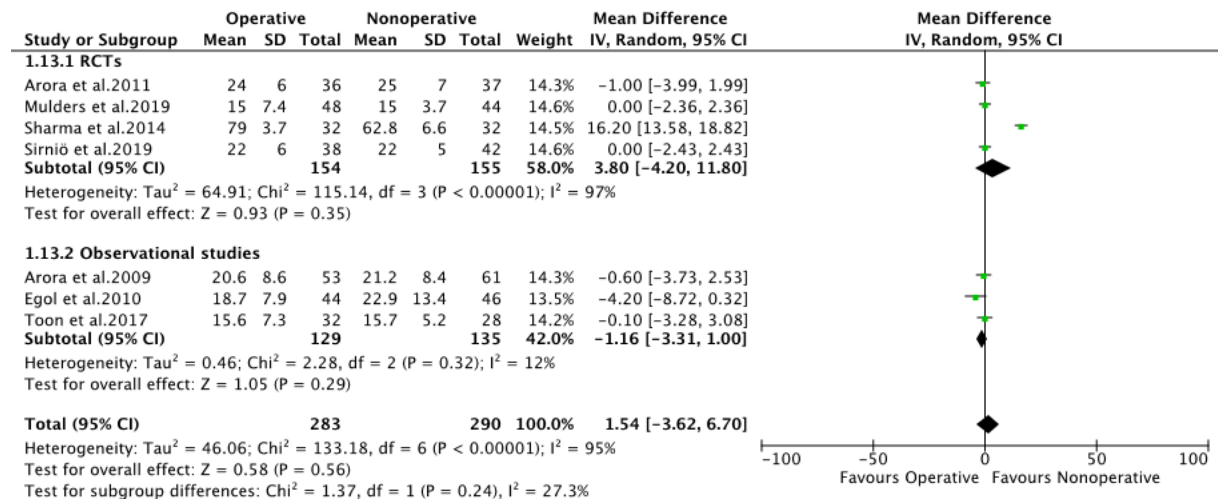

**eFigure 16.** Forest Plot of Ulnar Deviation in Degrees in a Meta-analysis of Distal Radius Fractures

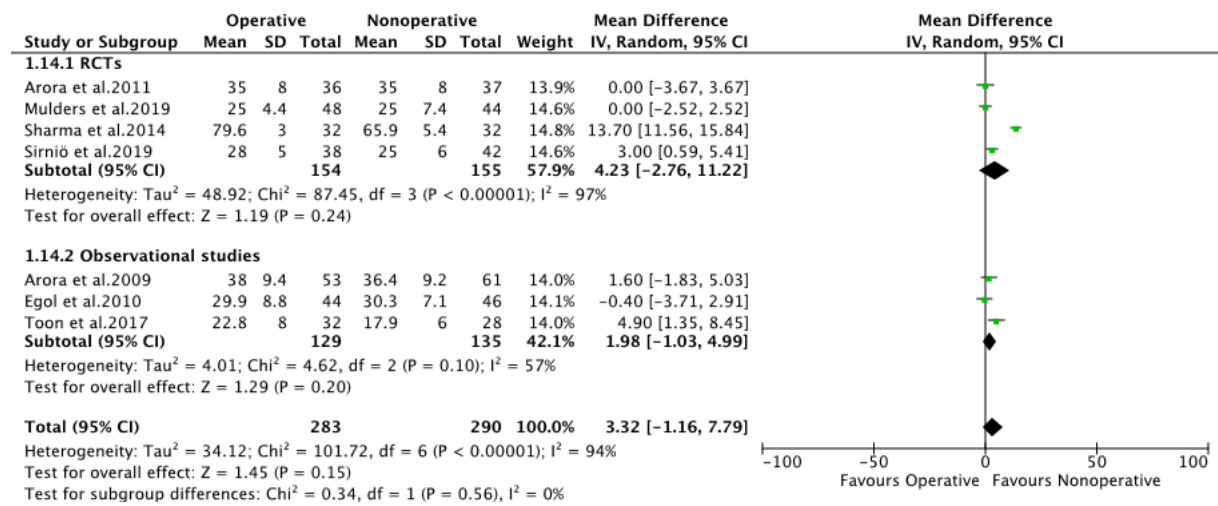

**eFigure 17.** Forest Plot of Volar Tilt in Degrees in a Meta-analysis of Distal Radius Fractures

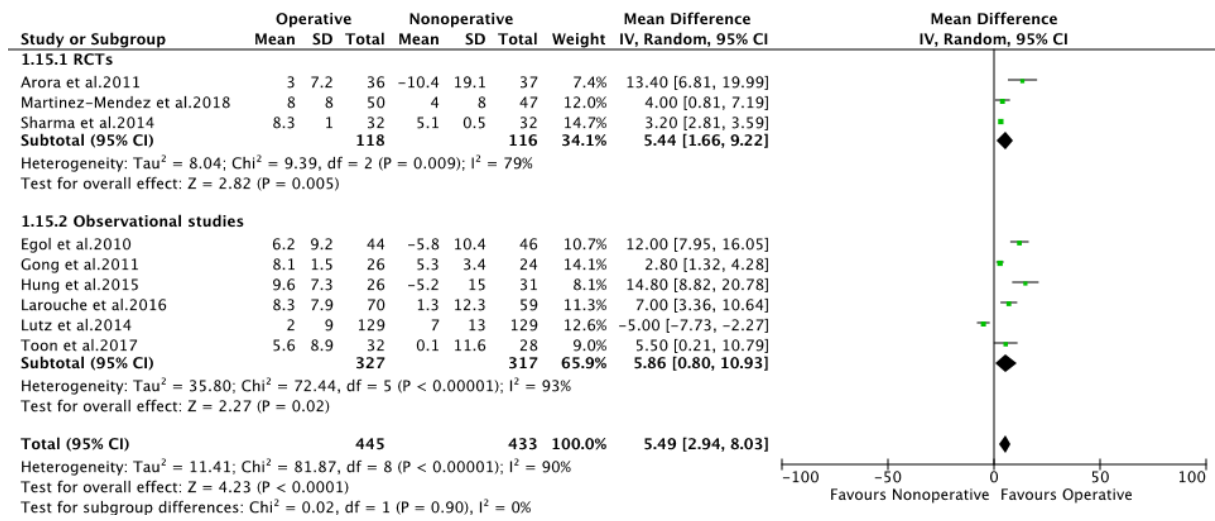

**eFigure 18.** Forest Plot of Radial Inclination in Degrees in a Meta-analysis of Distal Radius Fractures

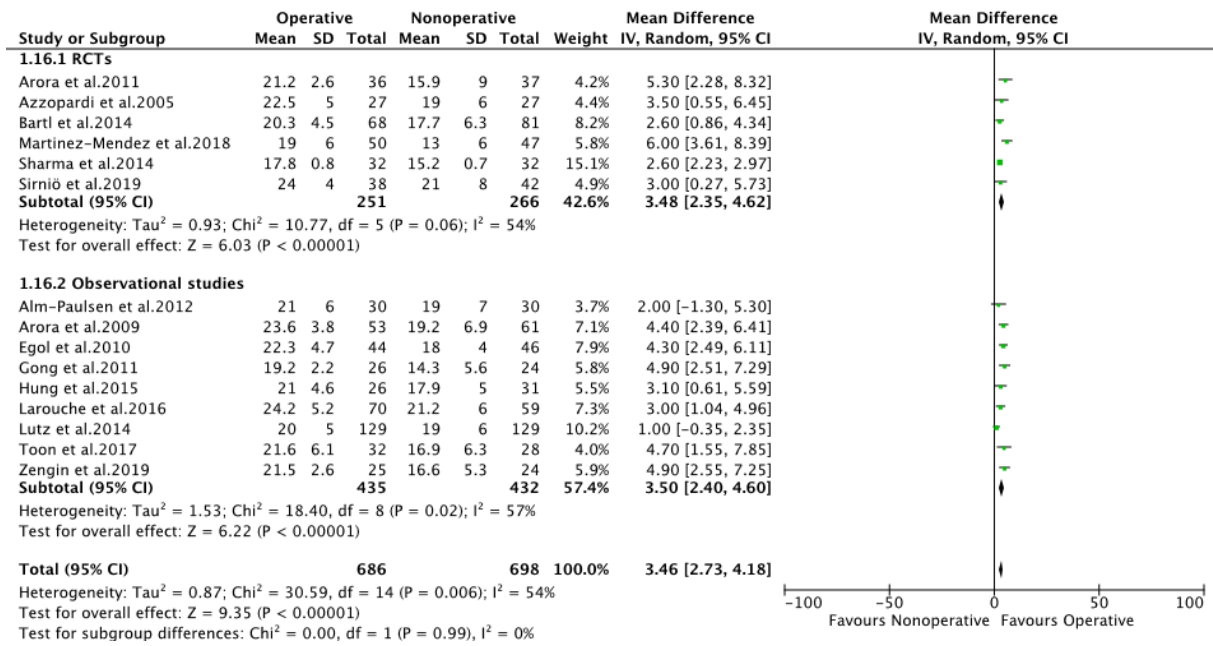

**eFigure 19.** Forest Plot of Radial Height in Millimeters in a Meta-analysis of Distal Radius Fractures

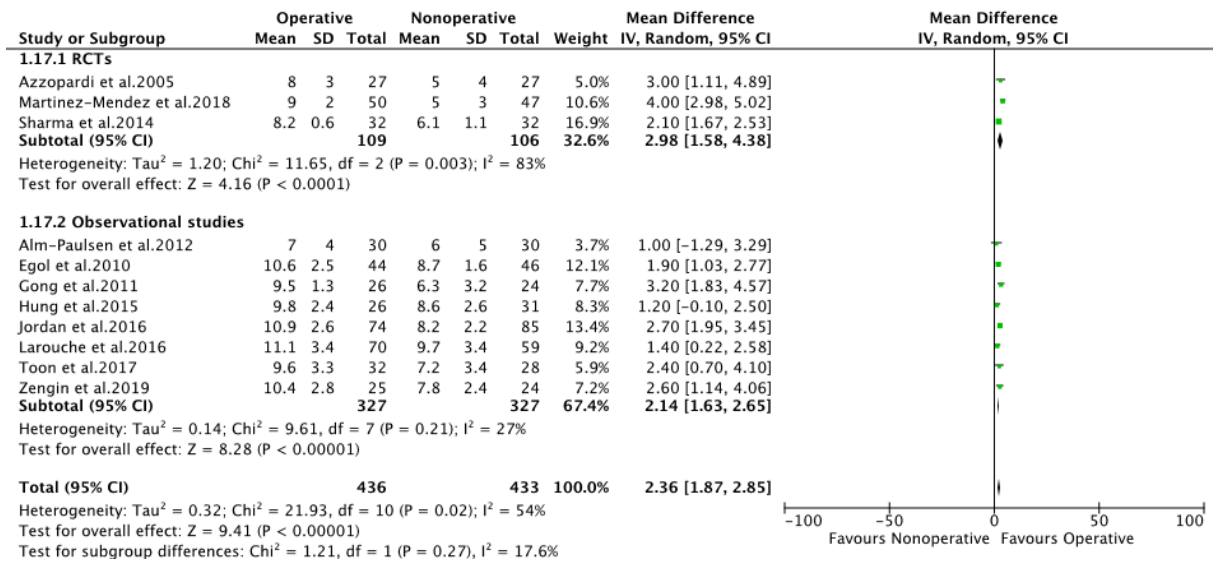

**eFigure 20.** Forest Plot Of Articular Step-off in Millimeters in a Meta-analysis of Distal Radius Fractures

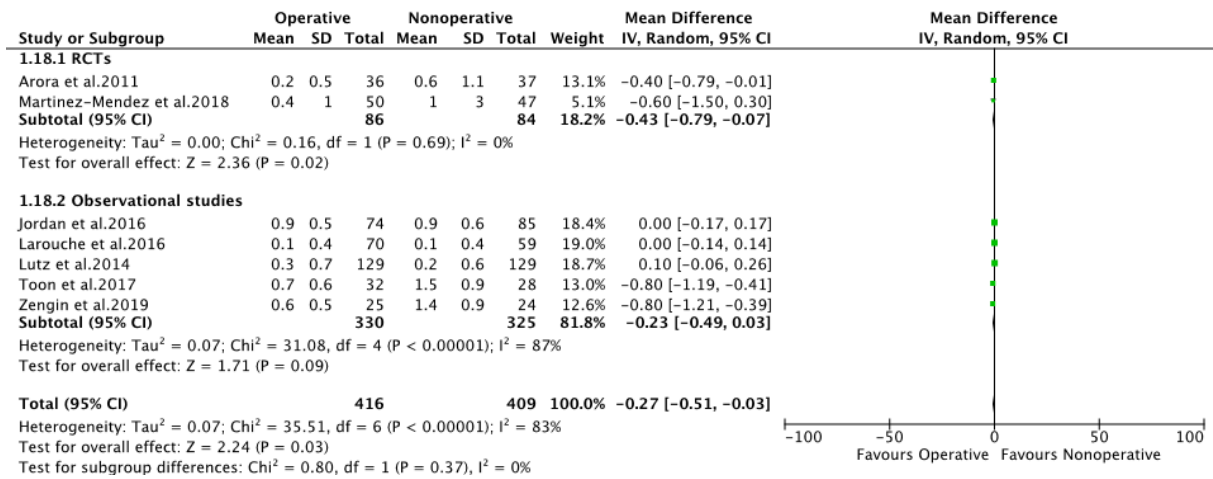

**eFigure 21.** Forest Plot of Ulnar Variance in Millimeters in a Meta-analysis of Distal Radius Fractures

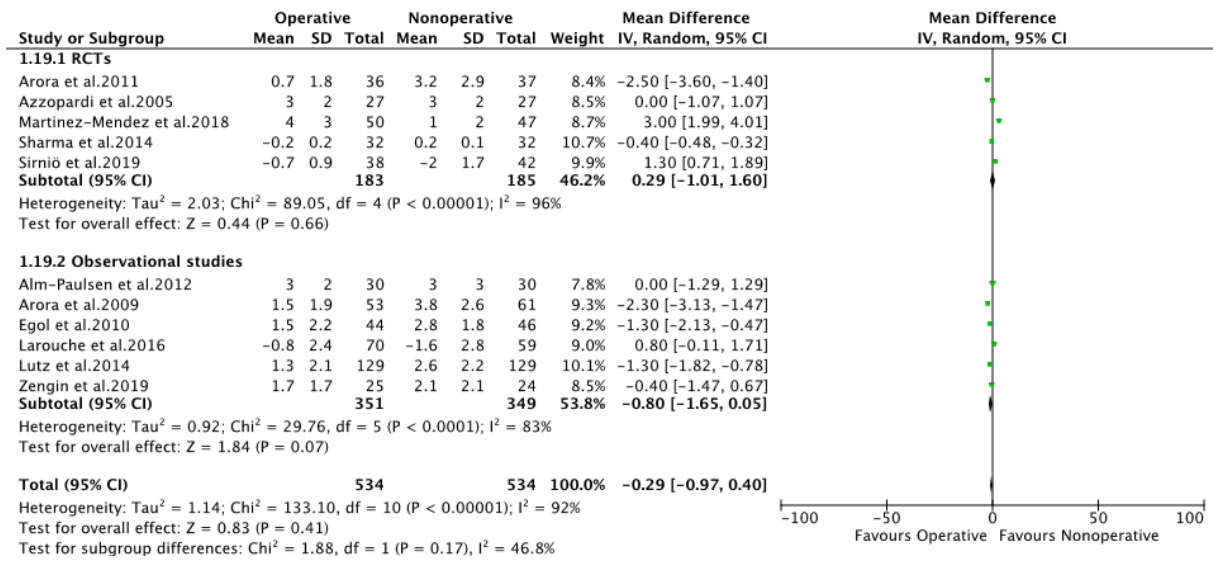

**eFigure 22.** Forest Plot of Medium-Term ( $\leq 1$  y) DASH Score for Studies That Only Included Patients With Age  $>60$  Years and Other Studies That Included Patients With Age  $\geq 18$  Years in a Meta-analysis of Distal Radius Fractures

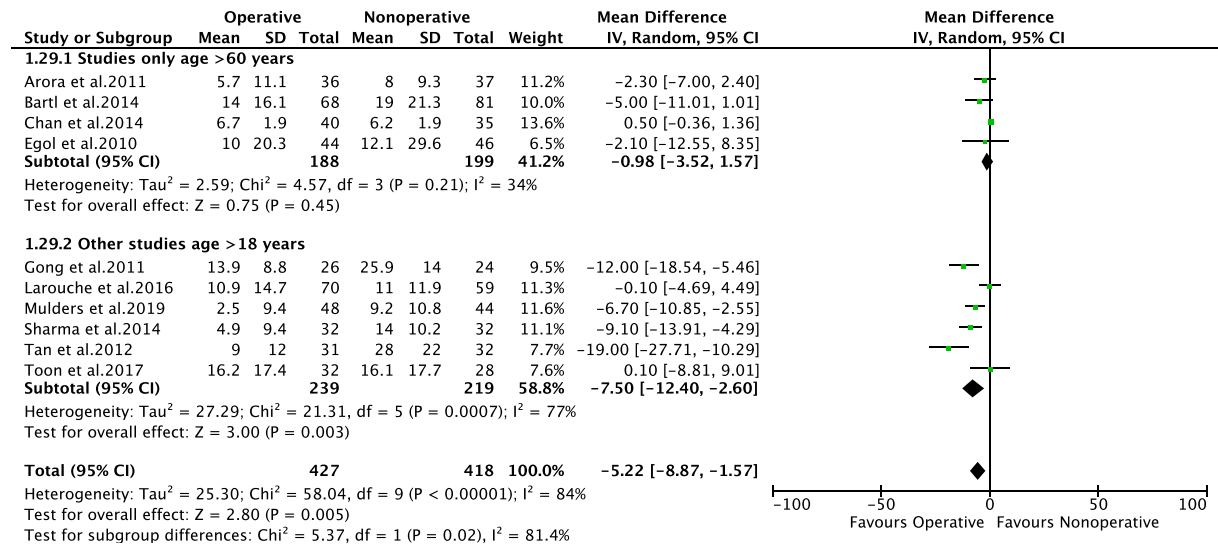



**eFigure 23.** Forest Plot of Complication Rate for Studies That Only Included Patients With Age >60 Years and Other Studies That Included Patients With Age ≥18 Years in a Meta-analysis of Distal Radius Fractures

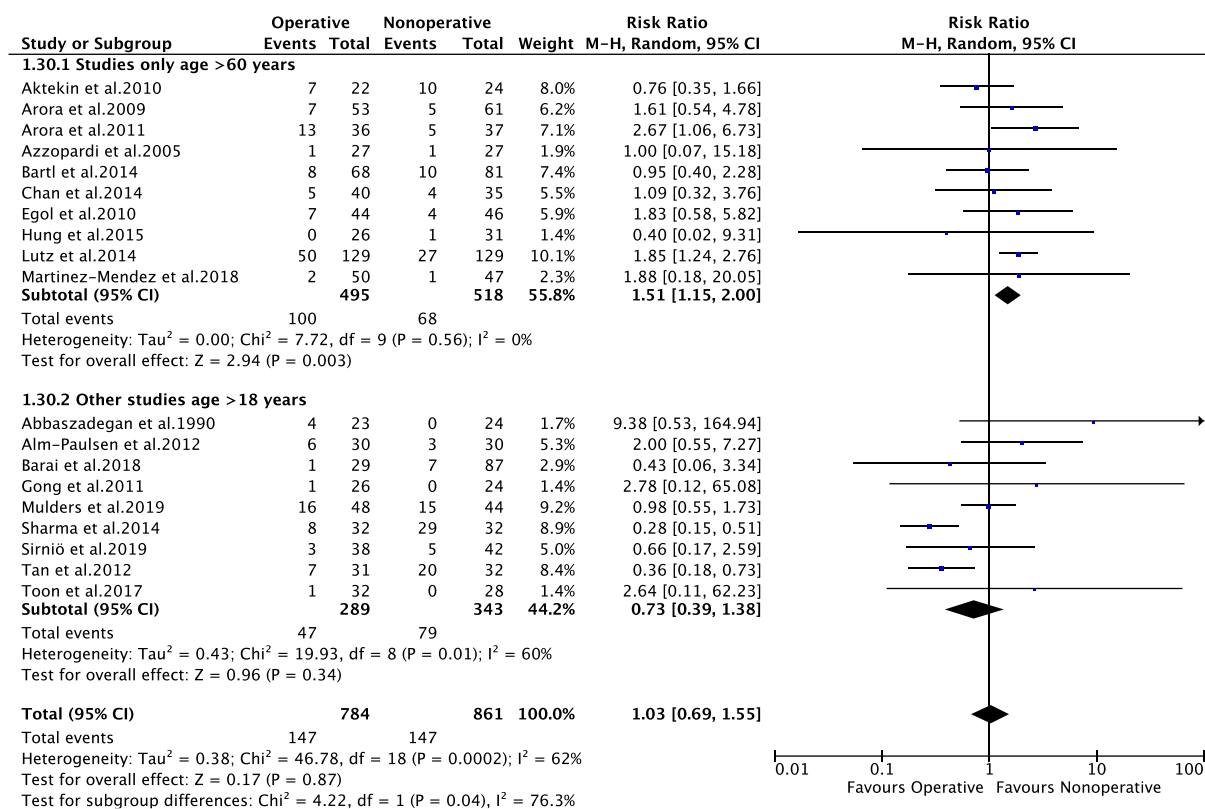

**eFigure 24.** Forest Plot of Medium-Term ( $\leq 1$  y) DASH Score in High-Quality Studies in a Meta-analysis of Distal Radius Fractures

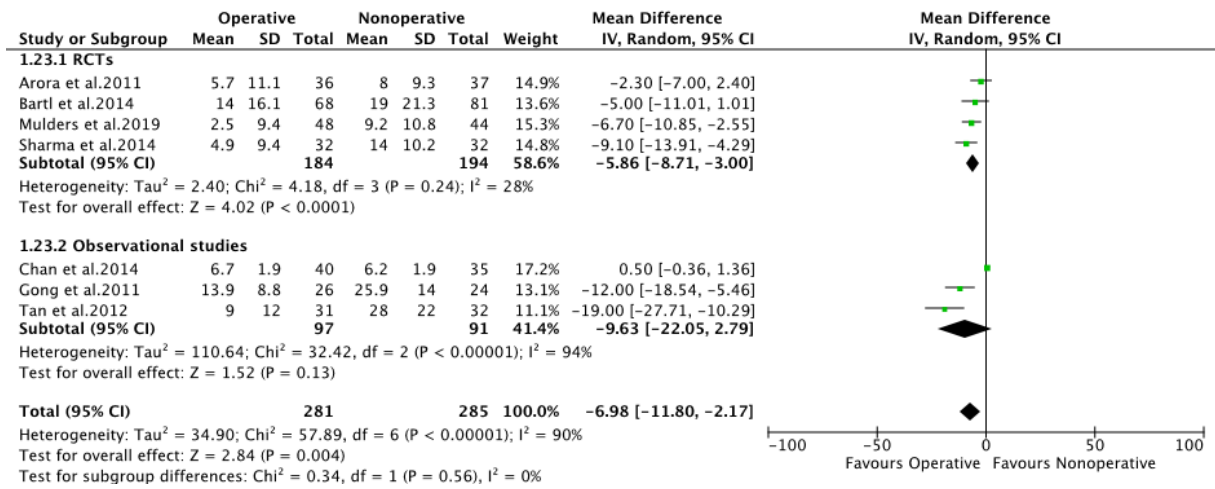

**eFigure 25.** Forest Plot of Complication Rate in High-Quality Studies in a Meta-analysis of Distal Radius Fractures

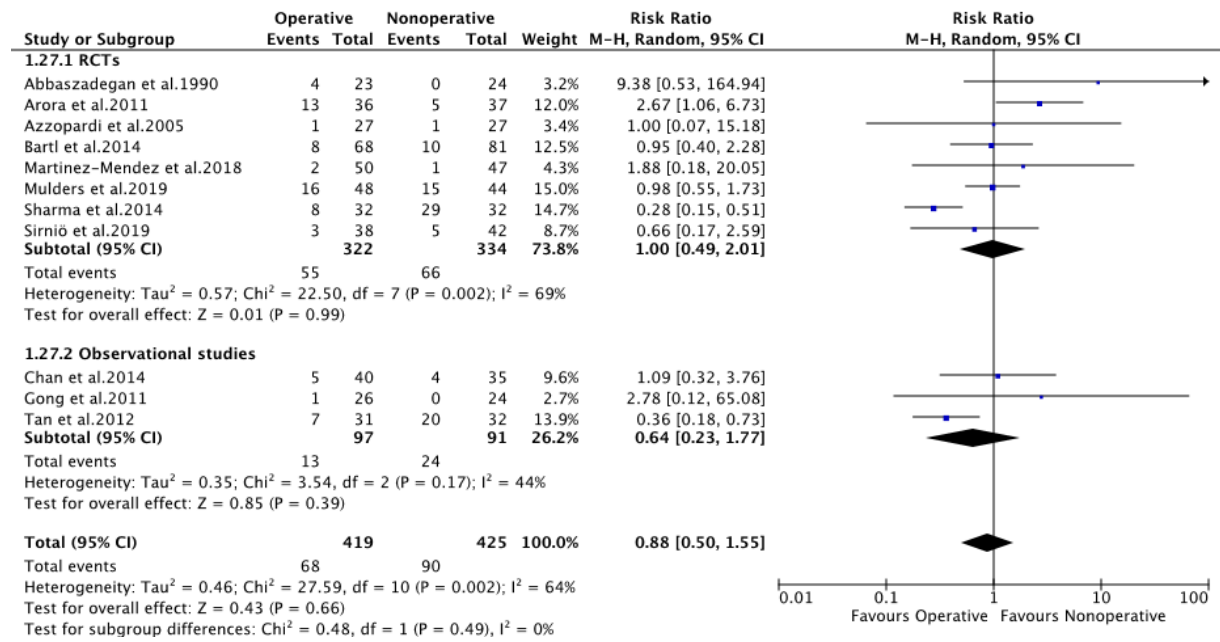

**eFigure 26.** Forest Plot of Medium-Term ( $\leq 1$  y) DASH Score in Studies With a Study Period After 2008 in a Meta-analysis of Distal Radius Fractures

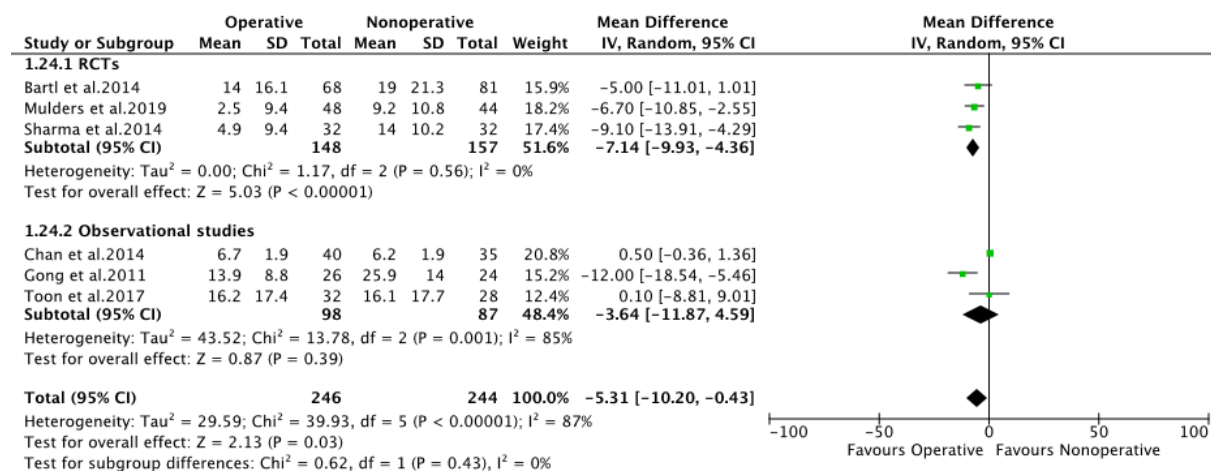

**eFigure 27.** Forest Plot of Complication Rate in Studies With a Study Period After 2008 in a Meta-analysis of Distal Radius Fractures

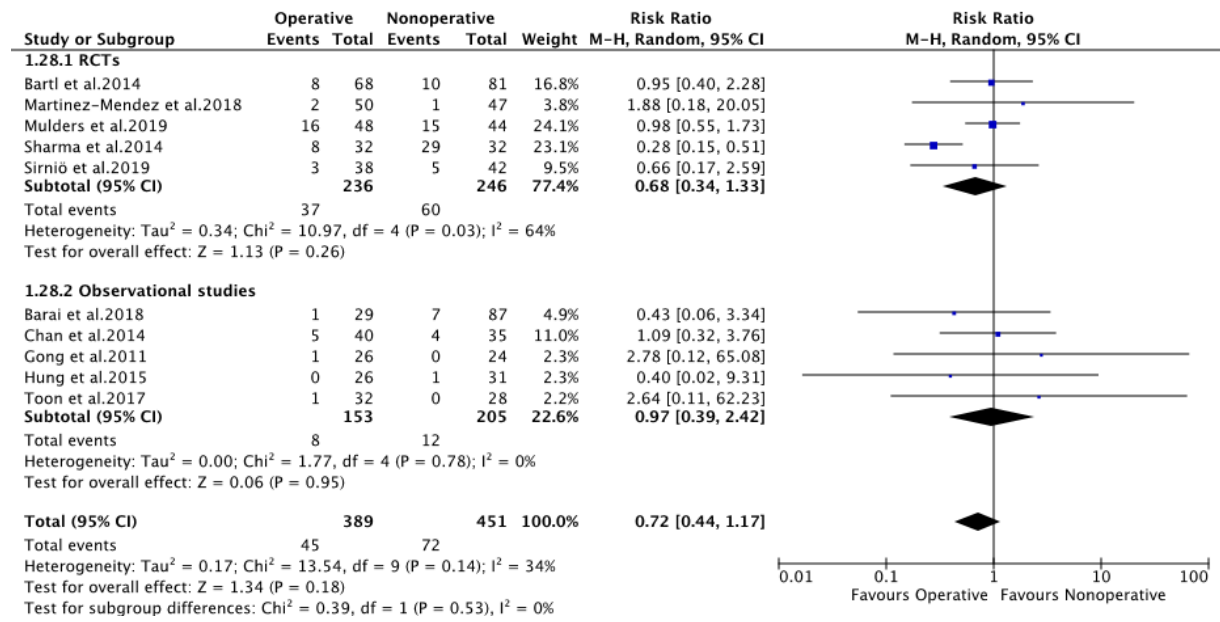

Supplement: jamanetwopen-3-e203497-s001.pdf [file jamanetwopen-3-e203497-s001.pdf]
